# Supplementary material for: Daylight-driven carbon exchange through a vertically structured microbial community
Source: Front Microbiol. 2023 May 26;14:1139213. doi: 10.3389/fmicb.2023.1139213 (PMC10251406; doi:10.3389/fmicb.2023.1139213)
Supplement: Supplementary file 2 [file Table_2.XLSX]

## Sheet: Sheet1
Supplementary Table 2: Impact of acid washing on mat biomass. Aliquots of mat samples were dried and 13C content measured using elemental analyzer isotope ratio mass spectrometry. Samples were split into three fractions: 1) whole mat samples, 2) mat samples following acid treatment (6N HCl overnight followed by rinses with deionized water), and 3) supernatant recovered from the acid washes and dr…
	Whole mat			Mat post-acid treatment			Material removed by acid treatment
	δ13C (‰)	stan. dev. (‰)	Replicates (n)	δ13C (‰)	stan. dev. (‰)	Replicates (n)	δ13C (‰)	stan. dev. (‰)	Replicates (n)
Control	-9.80089	0.265514	3	-14.2188	0.0904273	3	-10.1876	0.0644418	3
13C bicarbonate	75.7802	1.75713	3	44.4007	3.29283	3	193.333	1.07165	3
13C acetate	2026.34	32.3255	3	2972	51.7773	3	1524.57	26.4169	3
13C glucose	1159.31	8.84736	2	582.015	10.012	3	3674.52	139.103	3
