# Supplementary material for: Daylight-driven carbon exchange through a vertically structured microbial community
Source: Front Microbiol. 2023 May 26;14:1139213. doi: 10.3389/fmicb.2023.1139213 (PMC10251406; doi:10.3389/fmicb.2023.1139213)
Supplement: Supplementary file 3 [file Table_3.XLSX]

## Sheet: Sup table 1
Supplemental table 3: Laser ablation isotope ratio mass spectrometry data from depth profiles in each of the analyzed samples
