# Supplementary material for: Daylight-driven carbon exchange through a vertically structured microbial community
Source: Front Microbiol. 2023 May 26;14:1139213. doi: 10.3389/fmicb.2023.1139213 (PMC10251406; doi:10.3389/fmicb.2023.1139213)
Supplement: Supplementary file 4 [file Table_4.XLSX]

## Sheet: SIP_KEGG_pathway.all.sum
Supplementary table 4: Proteomic data output from SIPPER software highlighting isotopically labeled proteins identified in sample incubations.
Organisms	Sample	KEGG Pathway 1	KEGG Pathway 2	KEGG Pathway 3	Sum of KEGG pathways (percent abundance)
cyano	AceBT4.Label	Environmental Information Processing	Cell growth and death	Cell cycle Caulobacter	0
cyano	AceBT6.Label	Environmental Information Processing	Cell growth and death	Cell cycle Caulobacter	0
cyano	AceBT8.Label	Environmental Information Processing	Cell growth and death	Cell cycle Caulobacter	0
cyano	GluT4.Label	Environmental Information Processing	Cell growth and death	Cell cycle Caulobacter	0
cyano	GluT6.Label	Environmental Information Processing	Cell growth and death	Cell cycle Caulobacter	0.000137855
cyano	GluT8.Label	Environmental Information Processing	Cell growth and death	Cell cycle Caulobacter	0.000388651
cyano	L13T4.Label	Environmental Information Processing	Cell growth and death	Cell cycle Caulobacter	0
cyano	L13T6.Label	Environmental Information Processing	Cell growth and death	Cell cycle Caulobacter	0
cyano	L13T8.Label	Environmental Information Processing	Cell growth and death	Cell cycle Caulobacter	0.00056346
NC	AceBT4.Label	Environmental Information Processing	Cell motility	Bacterial chemotaxis	0
NC	AceBT6.Label	Environmental Information Processing	Cell motility	Bacterial chemotaxis	0
NC	AceBT8.Label	Environmental Information Processing	Cell motility	Bacterial chemotaxis	0
NC	GluT4.Label	Environmental Information Processing	Cell motility	Bacterial chemotaxis	0
NC	GluT6.Label	Environmental Information Processing	Cell motility	Bacterial chemotaxis	0
NC	GluT8.Label	Environmental Information Processing	Cell motility	Bacterial chemotaxis	0
NC	L13T4.Label	Environmental Information Processing	Cell motility	Bacterial chemotaxis	0.000118582
NC	L13T6.Label	Environmental Information Processing	Cell motility	Bacterial chemotaxis	0
NC	L13T8.Label	Environmental Information Processing	Cell motility	Bacterial chemotaxis	0
NC	AceBT4.Label	Environmental Information Processing	Cell motility	Flagellar assembly	0
NC	AceBT6.Label	Environmental Information Processing	Cell motility	Flagellar assembly	0
NC	AceBT8.Label	Environmental Information Processing	Cell motility	Flagellar assembly	8.44e-05
NC	GluT4.Label	Environmental Information Processing	Cell motility	Flagellar assembly	0.000109902
NC	GluT6.Label	Environmental Information Processing	Cell motility	Flagellar assembly	0.000137855
NC	GluT8.Label	Environmental Information Processing	Cell motility	Flagellar assembly	0
NC	L13T4.Label	Environmental Information Processing	Cell motility	Flagellar assembly	0
NC	L13T6.Label	Environmental Information Processing	Cell motility	Flagellar assembly	0
NC	L13T8.Label	Environmental Information Processing	Cell motility	Flagellar assembly	0
cyano	AceBT4.Label	Environmental Information Processing	Membrane transport	ABC transporters	0.000256838
cyano	AceBT6.Label	Environmental Information Processing	Membrane transport	ABC transporters	0
cyano	AceBT8.Label	Environmental Information Processing	Membrane transport	ABC transporters	0.0001688
cyano	GluT4.Label	Environmental Information Processing	Membrane transport	ABC transporters	0.000329706
cyano	GluT6.Label	Environmental Information Processing	Membrane transport	ABC transporters	0.000137855
cyano	GluT8.Label	Environmental Information Processing	Membrane transport	ABC transporters	0.00116595
cyano	L13T4.Label	Environmental Information Processing	Membrane transport	ABC transporters	0.000474327
cyano	L13T6.Label	Environmental Information Processing	Membrane transport	ABC transporters	0
cyano	L13T8.Label	Environmental Information Processing	Membrane transport	ABC transporters	0.00084519
NC	AceBT4.Label	Environmental Information Processing	Membrane transport	ABC transporters	0
NC	AceBT6.Label	Environmental Information Processing	Membrane transport	ABC transporters	0
NC	AceBT8.Label	Environmental Information Processing	Membrane transport	ABC transporters	0.0001688
NC	GluT4.Label	Environmental Information Processing	Membrane transport	ABC transporters	0.00186834
NC	GluT6.Label	Environmental Information Processing	Membrane transport	ABC transporters	0.00179211
NC	GluT8.Label	Environmental Information Processing	Membrane transport	ABC transporters	0.00194326
NC	L13T4.Label	Environmental Information Processing	Membrane transport	ABC transporters	0.000474328
NC	L13T6.Label	Environmental Information Processing	Membrane transport	ABC transporters	0.000205128
NC	L13T8.Label	Environmental Information Processing	Membrane transport	ABC transporters	0.00028173
cyano	AceBT4.Label	Environmental Information Processing	Membrane transport	Bacterial secretion system	0
cyano	AceBT6.Label	Environmental Information Processing	Membrane transport	Bacterial secretion system	0
cyano	AceBT8.Label	Environmental Information Processing	Membrane transport	Bacterial secretion system	0
cyano	GluT4.Label	Environmental Information Processing	Membrane transport	Bacterial secretion system	0
cyano	GluT6.Label	Environmental Information Processing	Membrane transport	Bacterial secretion system	0
cyano	GluT8.Label	Environmental Information Processing	Membrane transport	Bacterial secretion system	0
cyano	L13T4.Label	Environmental Information Processing	Membrane transport	Bacterial secretion system	0
cyano	L13T6.Label	Environmental Information Processing	Membrane transport	Bacterial secretion system	0
cyano	L13T8.Label	Environmental Information Processing	Membrane transport	Bacterial secretion system	0.00028173
cyano	AceBT4.Label	Environmental Information Processing	Signal transduction	AMPK signaling pathway	0
cyano	AceBT6.Label	Environmental Information Processing	Signal transduction	AMPK signaling pathway	0.000303306
cyano	AceBT8.Label	Environmental Information Processing	Signal transduction	AMPK signaling pathway	0.000168748
cyano	GluT4.Label	Environmental Information Processing	Signal transduction	AMPK signaling pathway	0
cyano	GluT6.Label	Environmental Information Processing	Signal transduction	AMPK signaling pathway	0
cyano	GluT8.Label	Environmental Information Processing	Signal transduction	AMPK signaling pathway	0
cyano	L13T4.Label	Environmental Information Processing	Signal transduction	AMPK signaling pathway	0.000118582
cyano	L13T6.Label	Environmental Information Processing	Signal transduction	AMPK signaling pathway	0
cyano	L13T8.Label	Environmental Information Processing	Signal transduction	AMPK signaling pathway	0.000845189
NC	AceBT4.Label	Environmental Information Processing	Signal transduction	AMPK signaling pathway	0
NC	AceBT6.Label	Environmental Information Processing	Signal transduction	AMPK signaling pathway	0
NC	AceBT8.Label	Environmental Information Processing	Signal transduction	AMPK signaling pathway	0
NC	GluT4.Label	Environmental Information Processing	Signal transduction	AMPK signaling pathway	0
NC	GluT6.Label	Environmental Information Processing	Signal transduction	AMPK signaling pathway	0
NC	GluT8.Label	Environmental Information Processing	Signal transduction	AMPK signaling pathway	0.000259101
NC	L13T4.Label	Environmental Information Processing	Signal transduction	AMPK signaling pathway	0
NC	L13T6.Label	Environmental Information Processing	Signal transduction	AMPK signaling pathway	0.000205128
NC	L13T8.Label	Environmental Information Processing	Signal transduction	AMPK signaling pathway	0
cyano	AceBT4.Label	Environmental Information Processing	Signal transduction	FoxO signaling pathway	0
cyano	AceBT6.Label	Environmental Information Processing	Signal transduction	FoxO signaling pathway	0
cyano	AceBT8.Label	Environmental Information Processing	Signal transduction	FoxO signaling pathway	0
cyano	GluT4.Label	Environmental Information Processing	Signal transduction	FoxO signaling pathway	0
cyano	GluT6.Label	Environmental Information Processing	Signal transduction	FoxO signaling pathway	0
cyano	GluT8.Label	Environmental Information Processing	Signal transduction	FoxO signaling pathway	0
cyano	L13T4.Label	Environmental Information Processing	Signal transduction	FoxO signaling pathway	0
cyano	L13T6.Label	Environmental Information Processing	Signal transduction	FoxO signaling pathway	0
cyano	L13T8.Label	Environmental Information Processing	Signal transduction	FoxO signaling pathway	0.00154951
NC	AceBT4.Label	Environmental Information Processing	Signal transduction	FoxO signaling pathway	0
NC	AceBT6.Label	Environmental Information Processing	Signal transduction	FoxO signaling pathway	0
NC	AceBT8.Label	Environmental Information Processing	Signal transduction	FoxO signaling pathway	0
NC	GluT4.Label	Environmental Information Processing	Signal transduction	FoxO signaling pathway	0.000109902
NC	GluT6.Label	Environmental Information Processing	Signal transduction	FoxO signaling pathway	0
NC	GluT8.Label	Environmental Information Processing	Signal transduction	FoxO signaling pathway	0
NC	L13T4.Label	Environmental Information Processing	Signal transduction	FoxO signaling pathway	0
NC	L13T6.Label	Environmental Information Processing	Signal transduction	FoxO signaling pathway	0
NC	L13T8.Label	Environmental Information Processing	Signal transduction	FoxO signaling pathway	0
cyano	AceBT4.Label	Environmental Information Processing	Signal transduction	HIF1 signaling pathway	0
cyano	AceBT6.Label	Environmental Information Processing	Signal transduction	HIF1 signaling pathway	0.000808816
cyano	AceBT8.Label	Environmental Information Processing	Signal transduction	HIF1 signaling pathway	0.0001688
cyano	GluT4.Label	Environmental Information Processing	Signal transduction	HIF1 signaling pathway	0
cyano	GluT6.Label	Environmental Information Processing	Signal transduction	HIF1 signaling pathway	0.00082713
cyano	GluT8.Label	Environmental Information Processing	Signal transduction	HIF1 signaling pathway	0.00116595
cyano	L13T4.Label	Environmental Information Processing	Signal transduction	HIF1 signaling pathway	0
cyano	L13T6.Label	Environmental Information Processing	Signal transduction	HIF1 signaling pathway	0
cyano	L13T8.Label	Environmental Information Processing	Signal transduction	HIF1 signaling pathway	0.00408508
NC	AceBT4.Label	Environmental Information Processing	Signal transduction	HIF1 signaling pathway	0
NC	AceBT6.Label	Environmental Information Processing	Signal transduction	HIF1 signaling pathway	0.000101102
NC	AceBT8.Label	Environmental Information Processing	Signal transduction	HIF1 signaling pathway	0
NC	GluT4.Label	Environmental Information Processing	Signal transduction	HIF1 signaling pathway	0
NC	GluT6.Label	Environmental Information Processing	Signal transduction	HIF1 signaling pathway	0
NC	GluT8.Label	Environmental Information Processing	Signal transduction	HIF1 signaling pathway	0
NC	L13T4.Label	Environmental Information Processing	Signal transduction	HIF1 signaling pathway	0
NC	L13T6.Label	Environmental Information Processing	Signal transduction	HIF1 signaling pathway	0
NC	L13T8.Label	Environmental Information Processing	Signal transduction	HIF1 signaling pathway	0
NC	AceBT4.Label	Environmental Information Processing	Signal transduction	MAPK signaling pathway yeast	0
NC	AceBT6.Label	Environmental Information Processing	Signal transduction	MAPK signaling pathway yeast	0
NC	AceBT8.Label	Environmental Information Processing	Signal transduction	MAPK signaling pathway yeast	8.44e-05
NC	GluT4.Label	Environmental Information Processing	Signal transduction	MAPK signaling pathway yeast	0
NC	GluT6.Label	Environmental Information Processing	Signal transduction	MAPK signaling pathway yeast	0
NC	GluT8.Label	Environmental Information Processing	Signal transduction	MAPK signaling pathway yeast	0
NC	L13T4.Label	Environmental Information Processing	Signal transduction	MAPK signaling pathway yeast	0
NC	L13T6.Label	Environmental Information Processing	Signal transduction	MAPK signaling pathway yeast	0
NC	L13T8.Label	Environmental Information Processing	Signal transduction	MAPK signaling pathway yeast	0
cyano	AceBT4.Label	Environmental Information Processing	Signal transduction	Phosphatidylinositol signaling system	0
cyano	AceBT6.Label	Environmental Information Processing	Signal transduction	Phosphatidylinositol signaling system	0
cyano	AceBT8.Label	Environmental Information Processing	Signal transduction	Phosphatidylinositol signaling system	0
cyano	GluT4.Label	Environmental Information Processing	Signal transduction	Phosphatidylinositol signaling system	0
cyano	GluT6.Label	Environmental Information Processing	Signal transduction	Phosphatidylinositol signaling system	0
cyano	GluT8.Label	Environmental Information Processing	Signal transduction	Phosphatidylinositol signaling system	0
cyano	L13T4.Label	Environmental Information Processing	Signal transduction	Phosphatidylinositol signaling system	0
cyano	L13T6.Label	Environmental Information Processing	Signal transduction	Phosphatidylinositol signaling system	0
cyano	L13T8.Label	Environmental Information Processing	Signal transduction	Phosphatidylinositol signaling system	0.000422595
cyano	AceBT4.Label	Environmental Information Processing	Signal transduction	PI3KAkt signaling pathway	0
cyano	AceBT6.Label	Environmental Information Processing	Signal transduction	PI3KAkt signaling pathway	0
cyano	AceBT8.Label	Environmental Information Processing	Signal transduction	PI3KAkt signaling pathway	0
cyano	GluT4.Label	Environmental Information Processing	Signal transduction	PI3KAkt signaling pathway	0.000109902
cyano	GluT6.Label	Environmental Information Processing	Signal transduction	PI3KAkt signaling pathway	0
cyano	GluT8.Label	Environmental Information Processing	Signal transduction	PI3KAkt signaling pathway	0
cyano	L13T4.Label	Environmental Information Processing	Signal transduction	PI3KAkt signaling pathway	0
cyano	L13T6.Label	Environmental Information Processing	Signal transduction	PI3KAkt signaling pathway	0
cyano	L13T8.Label	Environmental Information Processing	Signal transduction	PI3KAkt signaling pathway	0.00028173
NC	AceBT4.Label	Environmental Information Processing	Signal transduction	PI3KAkt signaling pathway	0
NC	AceBT6.Label	Environmental Information Processing	Signal transduction	PI3KAkt signaling pathway	0
NC	AceBT8.Label	Environmental Information Processing	Signal transduction	PI3KAkt signaling pathway	0
NC	GluT4.Label	Environmental Information Processing	Signal transduction	PI3KAkt signaling pathway	0
NC	GluT6.Label	Environmental Information Processing	Signal transduction	PI3KAkt signaling pathway	0.000137855
NC	GluT8.Label	Environmental Information Processing	Signal transduction	PI3KAkt signaling pathway	0
NC	L13T4.Label	Environmental Information Processing	Signal transduction	PI3KAkt signaling pathway	0
NC	L13T6.Label	Environmental Information Processing	Signal transduction	PI3KAkt signaling pathway	0
NC	L13T8.Label	Environmental Information Processing	Signal transduction	PI3KAkt signaling pathway	0
cyano	AceBT4.Label	Environmental Information Processing	Signal transduction	Twocomponent system	0.00128419
cyano	AceBT6.Label	Environmental Information Processing	Signal transduction	Twocomponent system	0
cyano	AceBT8.Label	Environmental Information Processing	Signal transduction	Twocomponent system	0.000337496
cyano	GluT4.Label	Environmental Information Processing	Signal transduction	Twocomponent system	0.000219804
cyano	GluT6.Label	Environmental Information Processing	Signal transduction	Twocomponent system	0.000413565
cyano	GluT8.Label	Environmental Information Processing	Signal transduction	Twocomponent system	0.00207281
cyano	L13T4.Label	Environmental Information Processing	Signal transduction	Twocomponent system	0.000355745
cyano	L13T6.Label	Environmental Information Processing	Signal transduction	Twocomponent system	0
cyano	L13T8.Label	Environmental Information Processing	Signal transduction	Twocomponent system	0.00253557
NC	AceBT4.Label	Environmental Information Processing	Signal transduction	Twocomponent system	0
NC	AceBT6.Label	Environmental Information Processing	Signal transduction	Twocomponent system	0.000101102
NC	AceBT8.Label	Environmental Information Processing	Signal transduction	Twocomponent system	0.0001688
NC	GluT4.Label	Environmental Information Processing	Signal transduction	Twocomponent system	0.00164853
NC	GluT6.Label	Environmental Information Processing	Signal transduction	Twocomponent system	0.00179211
NC	GluT8.Label	Environmental Information Processing	Signal transduction	Twocomponent system	0.00142505
NC	L13T4.Label	Environmental Information Processing	Signal transduction	Twocomponent system	0.000118582
NC	L13T6.Label	Environmental Information Processing	Signal transduction	Twocomponent system	0
NC	L13T8.Label	Environmental Information Processing	Signal transduction	Twocomponent system	0.00056346
cyano	AceBT4.Label	Environmental Information Processing	Transport and catabolism	Peroxisome	0.000128419
cyano	AceBT6.Label	Environmental Information Processing	Transport and catabolism	Peroxisome	0.000101102
cyano	AceBT8.Label	Environmental Information Processing	Transport and catabolism	Peroxisome	0
cyano	GluT4.Label	Environmental Information Processing	Transport and catabolism	Peroxisome	0
cyano	GluT6.Label	Environmental Information Processing	Transport and catabolism	Peroxisome	0
cyano	GluT8.Label	Environmental Information Processing	Transport and catabolism	Peroxisome	0.000259101
cyano	L13T4.Label	Environmental Information Processing	Transport and catabolism	Peroxisome	0
cyano	L13T6.Label	Environmental Information Processing	Transport and catabolism	Peroxisome	0
cyano	L13T8.Label	Environmental Information Processing	Transport and catabolism	Peroxisome	0.00253557
NC	AceBT4.Label	Environmental Information Processing	Transport and catabolism	Peroxisome	0
NC	AceBT6.Label	Environmental Information Processing	Transport and catabolism	Peroxisome	0
NC	AceBT8.Label	Environmental Information Processing	Transport and catabolism	Peroxisome	0
NC	GluT4.Label	Environmental Information Processing	Transport and catabolism	Peroxisome	0.000219804
NC	GluT6.Label	Environmental Information Processing	Transport and catabolism	Peroxisome	0.00027571
NC	GluT8.Label	Environmental Information Processing	Transport and catabolism	Peroxisome	0.00012955
NC	L13T4.Label	Environmental Information Processing	Transport and catabolism	Peroxisome	0
NC	L13T6.Label	Environmental Information Processing	Transport and catabolism	Peroxisome	0
NC	L13T8.Label	Environmental Information Processing	Transport and catabolism	Peroxisome	0.000140865
cyano	AceBT4.Label	Genetic Information Processing	Folding, sorting and degradation	Protein export	0
cyano	AceBT6.Label	Genetic Information Processing	Folding, sorting and degradation	Protein export	0
cyano	AceBT8.Label	Genetic Information Processing	Folding, sorting and degradation	Protein export	0
cyano	GluT4.Label	Genetic Information Processing	Folding, sorting and degradation	Protein export	0
cyano	GluT6.Label	Genetic Information Processing	Folding, sorting and degradation	Protein export	0
cyano	GluT8.Label	Genetic Information Processing	Folding, sorting and degradation	Protein export	0
cyano	L13T4.Label	Genetic Information Processing	Folding, sorting and degradation	Protein export	0
cyano	L13T6.Label	Genetic Information Processing	Folding, sorting and degradation	Protein export	0
cyano	L13T8.Label	Genetic Information Processing	Folding, sorting and degradation	Protein export	0.00028173
cyano	AceBT4.Label	Genetic Information Processing	Folding, sorting and degradation	Protein processing in endoplasmic reticulum	0
cyano	AceBT6.Label	Genetic Information Processing	Folding, sorting and degradation	Protein processing in endoplasmic reticulum	0
cyano	AceBT8.Label	Genetic Information Processing	Folding, sorting and degradation	Protein processing in endoplasmic reticulum	8.44e-05
cyano	GluT4.Label	Genetic Information Processing	Folding, sorting and degradation	Protein processing in endoplasmic reticulum	0.000769315
cyano	GluT6.Label	Genetic Information Processing	Folding, sorting and degradation	Protein processing in endoplasmic reticulum	0
cyano	GluT8.Label	Genetic Information Processing	Folding, sorting and degradation	Protein processing in endoplasmic reticulum	0.000906853
cyano	L13T4.Label	Genetic Information Processing	Folding, sorting and degradation	Protein processing in endoplasmic reticulum	0.000948654
cyano	L13T6.Label	Genetic Information Processing	Folding, sorting and degradation	Protein processing in endoplasmic reticulum	0.000205128
cyano	L13T8.Label	Genetic Information Processing	Folding, sorting and degradation	Protein processing in endoplasmic reticulum	0.00140865
NC	AceBT4.Label	Genetic Information Processing	Folding, sorting and degradation	Protein processing in endoplasmic reticulum	0
NC	AceBT6.Label	Genetic Information Processing	Folding, sorting and degradation	Protein processing in endoplasmic reticulum	0.000202204
NC	AceBT8.Label	Genetic Information Processing	Folding, sorting and degradation	Protein processing in endoplasmic reticulum	0.000168748
NC	GluT4.Label	Genetic Information Processing	Folding, sorting and degradation	Protein processing in endoplasmic reticulum	0.000219804
NC	GluT6.Label	Genetic Information Processing	Folding, sorting and degradation	Protein processing in endoplasmic reticulum	0.00027571
NC	GluT8.Label	Genetic Information Processing	Folding, sorting and degradation	Protein processing in endoplasmic reticulum	0.00012955
NC	L13T4.Label	Genetic Information Processing	Folding, sorting and degradation	Protein processing in endoplasmic reticulum	0
NC	L13T6.Label	Genetic Information Processing	Folding, sorting and degradation	Protein processing in endoplasmic reticulum	0
NC	L13T8.Label	Genetic Information Processing	Folding, sorting and degradation	Protein processing in endoplasmic reticulum	0.000140865
cyano	AceBT4.Label	Genetic Information Processing	Folding, sorting and degradation	RNA degradation	0.000256838
cyano	AceBT6.Label	Genetic Information Processing	Folding, sorting and degradation	RNA degradation	0.000606612
cyano	AceBT8.Label	Genetic Information Processing	Folding, sorting and degradation	RNA degradation	0.00109694
cyano	GluT4.Label	Genetic Information Processing	Folding, sorting and degradation	RNA degradation	0.00307726
cyano	GluT6.Label	Genetic Information Processing	Folding, sorting and degradation	RNA degradation	0.00248139
cyano	GluT8.Label	Genetic Information Processing	Folding, sorting and degradation	RNA degradation	0.00181371
cyano	L13T4.Label	Genetic Information Processing	Folding, sorting and degradation	RNA degradation	0.00296454
cyano	L13T6.Label	Genetic Information Processing	Folding, sorting and degradation	RNA degradation	0.000410256
cyano	L13T8.Label	Genetic Information Processing	Folding, sorting and degradation	RNA degradation	0.0170447
NC	AceBT4.Label	Genetic Information Processing	Folding, sorting and degradation	RNA degradation	0
NC	AceBT6.Label	Genetic Information Processing	Folding, sorting and degradation	RNA degradation	0.000303306
NC	AceBT8.Label	Genetic Information Processing	Folding, sorting and degradation	RNA degradation	0
NC	GluT4.Label	Genetic Information Processing	Folding, sorting and degradation	RNA degradation	0.000769315
NC	GluT6.Label	Genetic Information Processing	Folding, sorting and degradation	RNA degradation	0.00082713
NC	GluT8.Label	Genetic Information Processing	Folding, sorting and degradation	RNA degradation	0.0010364
NC	L13T4.Label	Genetic Information Processing	Folding, sorting and degradation	RNA degradation	0.00118582
NC	L13T6.Label	Genetic Information Processing	Folding, sorting and degradation	RNA degradation	0.000205128
NC	L13T8.Label	Genetic Information Processing	Folding, sorting and degradation	RNA degradation	0.00126778
cyano	AceBT4.Label	Genetic Information Processing	Replication and repair	DNA replication	0
cyano	AceBT6.Label	Genetic Information Processing	Replication and repair	DNA replication	0
cyano	AceBT8.Label	Genetic Information Processing	Replication and repair	DNA replication	0
cyano	GluT4.Label	Genetic Information Processing	Replication and repair	DNA replication	0
cyano	GluT6.Label	Genetic Information Processing	Replication and repair	DNA replication	0
cyano	GluT8.Label	Genetic Information Processing	Replication and repair	DNA replication	0
cyano	L13T4.Label	Genetic Information Processing	Replication and repair	DNA replication	0
cyano	L13T6.Label	Genetic Information Processing	Replication and repair	DNA replication	0
cyano	L13T8.Label	Genetic Information Processing	Replication and repair	DNA replication	0.00028173
cyano	AceBT4.Label	Genetic Information Processing	Replication and repair	Homologous recombination	0
cyano	AceBT6.Label	Genetic Information Processing	Replication and repair	Homologous recombination	0
cyano	AceBT8.Label	Genetic Information Processing	Replication and repair	Homologous recombination	0
cyano	GluT4.Label	Genetic Information Processing	Replication and repair	Homologous recombination	0
cyano	GluT6.Label	Genetic Information Processing	Replication and repair	Homologous recombination	0
cyano	GluT8.Label	Genetic Information Processing	Replication and repair	Homologous recombination	0
cyano	L13T4.Label	Genetic Information Processing	Replication and repair	Homologous recombination	0
cyano	L13T6.Label	Genetic Information Processing	Replication and repair	Homologous recombination	0
cyano	L13T8.Label	Genetic Information Processing	Replication and repair	Homologous recombination	0.00028173
cyano	AceBT4.Label	Genetic Information Processing	Replication and repair	Mismatch repair	0
cyano	AceBT6.Label	Genetic Information Processing	Replication and repair	Mismatch repair	0
cyano	AceBT8.Label	Genetic Information Processing	Replication and repair	Mismatch repair	0
cyano	GluT4.Label	Genetic Information Processing	Replication and repair	Mismatch repair	0
cyano	GluT6.Label	Genetic Information Processing	Replication and repair	Mismatch repair	0
cyano	GluT8.Label	Genetic Information Processing	Replication and repair	Mismatch repair	0
cyano	L13T4.Label	Genetic Information Processing	Replication and repair	Mismatch repair	0
cyano	L13T6.Label	Genetic Information Processing	Replication and repair	Mismatch repair	0
cyano	L13T8.Label	Genetic Information Processing	Replication and repair	Mismatch repair	0.00028173
cyano	AceBT4.Label	Genetic Information Processing	Transcription	RNA polymerase	0
cyano	AceBT6.Label	Genetic Information Processing	Transcription	RNA polymerase	0
cyano	AceBT8.Label	Genetic Information Processing	Transcription	RNA polymerase	0
cyano	GluT4.Label	Genetic Information Processing	Transcription	RNA polymerase	0
cyano	GluT6.Label	Genetic Information Processing	Transcription	RNA polymerase	0
cyano	GluT8.Label	Genetic Information Processing	Transcription	RNA polymerase	0.00012955
cyano	L13T4.Label	Genetic Information Processing	Transcription	RNA polymerase	0
cyano	L13T6.Label	Genetic Information Processing	Transcription	RNA polymerase	0
cyano	L13T8.Label	Genetic Information Processing	Transcription	RNA polymerase	0.00028173
NC	AceBT4.Label	Genetic Information Processing	Transcription	RNA polymerase	0
NC	AceBT6.Label	Genetic Information Processing	Transcription	RNA polymerase	0
NC	AceBT8.Label	Genetic Information Processing	Transcription	RNA polymerase	0
NC	GluT4.Label	Genetic Information Processing	Transcription	RNA polymerase	0.000109902
NC	GluT6.Label	Genetic Information Processing	Transcription	RNA polymerase	0.000137855
NC	GluT8.Label	Genetic Information Processing	Transcription	RNA polymerase	0.000259101
NC	L13T4.Label	Genetic Information Processing	Transcription	RNA polymerase	0
NC	L13T6.Label	Genetic Information Processing	Transcription	RNA polymerase	0
NC	L13T8.Label	Genetic Information Processing	Transcription	RNA polymerase	0
cyano	AceBT4.Label	Genetic Information Processing	Translation	AminoacyltRNA biosynthesis	0
cyano	AceBT6.Label	Genetic Information Processing	Translation	AminoacyltRNA biosynthesis	0
cyano	AceBT8.Label	Genetic Information Processing	Translation	AminoacyltRNA biosynthesis	0
cyano	GluT4.Label	Genetic Information Processing	Translation	AminoacyltRNA biosynthesis	0
cyano	GluT6.Label	Genetic Information Processing	Translation	AminoacyltRNA biosynthesis	0
cyano	GluT8.Label	Genetic Information Processing	Translation	AminoacyltRNA biosynthesis	0.00038865
cyano	L13T4.Label	Genetic Information Processing	Translation	AminoacyltRNA biosynthesis	0
cyano	L13T6.Label	Genetic Information Processing	Translation	AminoacyltRNA biosynthesis	0
cyano	L13T8.Label	Genetic Information Processing	Translation	AminoacyltRNA biosynthesis	0.00169038
cyano	AceBT4.Label	Genetic Information Processing	Translation	Ribosome	0
cyano	AceBT6.Label	Genetic Information Processing	Translation	Ribosome	0.000101102
cyano	AceBT8.Label	Genetic Information Processing	Translation	Ribosome	0
cyano	GluT4.Label	Genetic Information Processing	Translation	Ribosome	0
cyano	GluT6.Label	Genetic Information Processing	Translation	Ribosome	0
cyano	GluT8.Label	Genetic Information Processing	Translation	Ribosome	0
cyano	L13T4.Label	Genetic Information Processing	Translation	Ribosome	0
cyano	L13T6.Label	Genetic Information Processing	Translation	Ribosome	0
cyano	L13T8.Label	Genetic Information Processing	Translation	Ribosome	0.000986055
NC	AceBT4.Label	Genetic Information Processing	Translation	Ribosome	0
NC	AceBT6.Label	Genetic Information Processing	Translation	Ribosome	0.000101102
NC	AceBT8.Label	Genetic Information Processing	Translation	Ribosome	0
NC	GluT4.Label	Genetic Information Processing	Translation	Ribosome	0
NC	GluT6.Label	Genetic Information Processing	Translation	Ribosome	0
NC	GluT8.Label	Genetic Information Processing	Translation	Ribosome	0
NC	L13T4.Label	Genetic Information Processing	Translation	Ribosome	0
NC	L13T6.Label	Genetic Information Processing	Translation	Ribosome	0
NC	L13T8.Label	Genetic Information Processing	Translation	Ribosome	0
cyano	AceBT4.Label	Metabolism	Amino acid metabolism	Alanine, aspartate and glutamate metabolism	0.00102735
cyano	AceBT6.Label	Metabolism	Amino acid metabolism	Alanine, aspartate and glutamate metabolism	0.000202204
cyano	AceBT8.Label	Metabolism	Amino acid metabolism	Alanine, aspartate and glutamate metabolism	0.000337496
cyano	GluT4.Label	Metabolism	Amino acid metabolism	Alanine, aspartate and glutamate metabolism	0
cyano	GluT6.Label	Metabolism	Amino acid metabolism	Alanine, aspartate and glutamate metabolism	0.000413565
cyano	GluT8.Label	Metabolism	Amino acid metabolism	Alanine, aspartate and glutamate metabolism	0.00194326
cyano	L13T4.Label	Metabolism	Amino acid metabolism	Alanine, aspartate and glutamate metabolism	0
cyano	L13T6.Label	Metabolism	Amino acid metabolism	Alanine, aspartate and glutamate metabolism	0
cyano	L13T8.Label	Metabolism	Amino acid metabolism	Alanine, aspartate and glutamate metabolism	0.00211297
NC	AceBT4.Label	Metabolism	Amino acid metabolism	Alanine, aspartate and glutamate metabolism	0
NC	AceBT6.Label	Metabolism	Amino acid metabolism	Alanine, aspartate and glutamate metabolism	0
NC	AceBT8.Label	Metabolism	Amino acid metabolism	Alanine, aspartate and glutamate metabolism	0
NC	GluT4.Label	Metabolism	Amino acid metabolism	Alanine, aspartate and glutamate metabolism	0
NC	GluT6.Label	Metabolism	Amino acid metabolism	Alanine, aspartate and glutamate metabolism	0
NC	GluT8.Label	Metabolism	Amino acid metabolism	Alanine, aspartate and glutamate metabolism	0
NC	L13T4.Label	Metabolism	Amino acid metabolism	Alanine, aspartate and glutamate metabolism	0.000118582
NC	L13T6.Label	Metabolism	Amino acid metabolism	Alanine, aspartate and glutamate metabolism	0
NC	L13T8.Label	Metabolism	Amino acid metabolism	Alanine, aspartate and glutamate metabolism	0.000140865
cyano	AceBT4.Label	Metabolism	Amino acid metabolism	Arginine and proline metabolism	0.00102735
cyano	AceBT6.Label	Metabolism	Amino acid metabolism	Arginine and proline metabolism	0
cyano	AceBT8.Label	Metabolism	Amino acid metabolism	Arginine and proline metabolism	0.000337496
cyano	GluT4.Label	Metabolism	Amino acid metabolism	Arginine and proline metabolism	0
cyano	GluT6.Label	Metabolism	Amino acid metabolism	Arginine and proline metabolism	0.00027571
cyano	GluT8.Label	Metabolism	Amino acid metabolism	Arginine and proline metabolism	0.00168416
cyano	L13T4.Label	Metabolism	Amino acid metabolism	Arginine and proline metabolism	0
cyano	L13T6.Label	Metabolism	Amino acid metabolism	Arginine and proline metabolism	0
cyano	L13T8.Label	Metabolism	Amino acid metabolism	Arginine and proline metabolism	0.00183124
NC	AceBT4.Label	Metabolism	Amino acid metabolism	Arginine and proline metabolism	0
NC	AceBT6.Label	Metabolism	Amino acid metabolism	Arginine and proline metabolism	0
NC	AceBT8.Label	Metabolism	Amino acid metabolism	Arginine and proline metabolism	0
NC	GluT4.Label	Metabolism	Amino acid metabolism	Arginine and proline metabolism	0
NC	GluT6.Label	Metabolism	Amino acid metabolism	Arginine and proline metabolism	0
NC	GluT8.Label	Metabolism	Amino acid metabolism	Arginine and proline metabolism	0
NC	L13T4.Label	Metabolism	Amino acid metabolism	Arginine and proline metabolism	0.000118582
NC	L13T6.Label	Metabolism	Amino acid metabolism	Arginine and proline metabolism	0
NC	L13T8.Label	Metabolism	Amino acid metabolism	Arginine and proline metabolism	0.000140865
cyano	AceBT4.Label	Metabolism	Amino acid metabolism	Cysteine and methionine metabolism	0
cyano	AceBT6.Label	Metabolism	Amino acid metabolism	Cysteine and methionine metabolism	0
cyano	AceBT8.Label	Metabolism	Amino acid metabolism	Cysteine and methionine metabolism	0
cyano	GluT4.Label	Metabolism	Amino acid metabolism	Cysteine and methionine metabolism	0
cyano	GluT6.Label	Metabolism	Amino acid metabolism	Cysteine and methionine metabolism	0.000137855
cyano	GluT8.Label	Metabolism	Amino acid metabolism	Cysteine and methionine metabolism	0.000518201
cyano	L13T4.Label	Metabolism	Amino acid metabolism	Cysteine and methionine metabolism	0
cyano	L13T6.Label	Metabolism	Amino acid metabolism	Cysteine and methionine metabolism	0
cyano	L13T8.Label	Metabolism	Amino acid metabolism	Cysteine and methionine metabolism	0.00154951
NC	AceBT4.Label	Metabolism	Amino acid metabolism	Cysteine and methionine metabolism	0
NC	AceBT6.Label	Metabolism	Amino acid metabolism	Cysteine and methionine metabolism	0
NC	AceBT8.Label	Metabolism	Amino acid metabolism	Cysteine and methionine metabolism	0
NC	GluT4.Label	Metabolism	Amino acid metabolism	Cysteine and methionine metabolism	0.000109902
NC	GluT6.Label	Metabolism	Amino acid metabolism	Cysteine and methionine metabolism	0
NC	GluT8.Label	Metabolism	Amino acid metabolism	Cysteine and methionine metabolism	0
NC	L13T4.Label	Metabolism	Amino acid metabolism	Cysteine and methionine metabolism	0.000118582
NC	L13T6.Label	Metabolism	Amino acid metabolism	Cysteine and methionine metabolism	0
NC	L13T8.Label	Metabolism	Amino acid metabolism	Cysteine and methionine metabolism	0.000140865
cyano	AceBT4.Label	Metabolism	Amino acid metabolism	Glycine, serine and threonine metabolism	0
cyano	AceBT6.Label	Metabolism	Amino acid metabolism	Glycine, serine and threonine metabolism	0.000202204
cyano	AceBT8.Label	Metabolism	Amino acid metabolism	Glycine, serine and threonine metabolism	0
cyano	GluT4.Label	Metabolism	Amino acid metabolism	Glycine, serine and threonine metabolism	0
cyano	GluT6.Label	Metabolism	Amino acid metabolism	Glycine, serine and threonine metabolism	0.000137855
cyano	GluT8.Label	Metabolism	Amino acid metabolism	Glycine, serine and threonine metabolism	0.000777302
cyano	L13T4.Label	Metabolism	Amino acid metabolism	Glycine, serine and threonine metabolism	0
cyano	L13T6.Label	Metabolism	Amino acid metabolism	Glycine, serine and threonine metabolism	0
cyano	L13T8.Label	Metabolism	Amino acid metabolism	Glycine, serine and threonine metabolism	0.00197211
NC	AceBT4.Label	Metabolism	Amino acid metabolism	Glycine, serine and threonine metabolism	0
NC	AceBT6.Label	Metabolism	Amino acid metabolism	Glycine, serine and threonine metabolism	0.000101102
NC	AceBT8.Label	Metabolism	Amino acid metabolism	Glycine, serine and threonine metabolism	0
NC	GluT4.Label	Metabolism	Amino acid metabolism	Glycine, serine and threonine metabolism	0
NC	GluT6.Label	Metabolism	Amino acid metabolism	Glycine, serine and threonine metabolism	0
NC	GluT8.Label	Metabolism	Amino acid metabolism	Glycine, serine and threonine metabolism	0
NC	L13T4.Label	Metabolism	Amino acid metabolism	Glycine, serine and threonine metabolism	0
NC	L13T6.Label	Metabolism	Amino acid metabolism	Glycine, serine and threonine metabolism	0
NC	L13T8.Label	Metabolism	Amino acid metabolism	Glycine, serine and threonine metabolism	0
cyano	AceBT4.Label	Metabolism	Amino acid metabolism	Lysine biosynthesis	0
cyano	AceBT6.Label	Metabolism	Amino acid metabolism	Lysine biosynthesis	0
cyano	AceBT8.Label	Metabolism	Amino acid metabolism	Lysine biosynthesis	0.000253122
cyano	GluT4.Label	Metabolism	Amino acid metabolism	Lysine biosynthesis	0
cyano	GluT6.Label	Metabolism	Amino acid metabolism	Lysine biosynthesis	0
cyano	GluT8.Label	Metabolism	Amino acid metabolism	Lysine biosynthesis	0.000518201
cyano	L13T4.Label	Metabolism	Amino acid metabolism	Lysine biosynthesis	0
cyano	L13T6.Label	Metabolism	Amino acid metabolism	Lysine biosynthesis	0.000205128
cyano	L13T8.Label	Metabolism	Amino acid metabolism	Lysine biosynthesis	0.00140865
cyano	AceBT4.Label	Metabolism	Amino acid metabolism	Lysine degradation	0
cyano	AceBT6.Label	Metabolism	Amino acid metabolism	Lysine degradation	0.000202204
cyano	AceBT8.Label	Metabolism	Amino acid metabolism	Lysine degradation	0
cyano	GluT4.Label	Metabolism	Amino acid metabolism	Lysine degradation	0
cyano	GluT6.Label	Metabolism	Amino acid metabolism	Lysine degradation	0.000137855
cyano	GluT8.Label	Metabolism	Amino acid metabolism	Lysine degradation	0.000259101
cyano	L13T4.Label	Metabolism	Amino acid metabolism	Lysine degradation	0
cyano	L13T6.Label	Metabolism	Amino acid metabolism	Lysine degradation	0
cyano	L13T8.Label	Metabolism	Amino acid metabolism	Lysine degradation	0.000422595
NC	AceBT4.Label	Metabolism	Amino acid metabolism	Lysine degradation	0
NC	AceBT6.Label	Metabolism	Amino acid metabolism	Lysine degradation	0
NC	AceBT8.Label	Metabolism	Amino acid metabolism	Lysine degradation	0
NC	GluT4.Label	Metabolism	Amino acid metabolism	Lysine degradation	0
NC	GluT6.Label	Metabolism	Amino acid metabolism	Lysine degradation	0
NC	GluT8.Label	Metabolism	Amino acid metabolism	Lysine degradation	0
NC	L13T4.Label	Metabolism	Amino acid metabolism	Lysine degradation	0
NC	L13T6.Label	Metabolism	Amino acid metabolism	Lysine degradation	0
NC	L13T8.Label	Metabolism	Amino acid metabolism	Lysine degradation	0.000140865
cyano	AceBT4.Label	Metabolism	Amino acid metabolism	Phenylalanine, tyrosine and tryptophan biosynthesis	0
cyano	AceBT6.Label	Metabolism	Amino acid metabolism	Phenylalanine, tyrosine and tryptophan biosynthesis	0
cyano	AceBT8.Label	Metabolism	Amino acid metabolism	Phenylalanine, tyrosine and tryptophan biosynthesis	8.44e-05
cyano	GluT4.Label	Metabolism	Amino acid metabolism	Phenylalanine, tyrosine and tryptophan biosynthesis	0
cyano	GluT6.Label	Metabolism	Amino acid metabolism	Phenylalanine, tyrosine and tryptophan biosynthesis	0
cyano	GluT8.Label	Metabolism	Amino acid metabolism	Phenylalanine, tyrosine and tryptophan biosynthesis	0.00012955
cyano	L13T4.Label	Metabolism	Amino acid metabolism	Phenylalanine, tyrosine and tryptophan biosynthesis	0
cyano	L13T6.Label	Metabolism	Amino acid metabolism	Phenylalanine, tyrosine and tryptophan biosynthesis	0
cyano	L13T8.Label	Metabolism	Amino acid metabolism	Phenylalanine, tyrosine and tryptophan biosynthesis	0.00056346
NC	AceBT4.Label	Metabolism	Amino acid metabolism	Phenylalanine, tyrosine and tryptophan biosynthesis	0
NC	AceBT6.Label	Metabolism	Amino acid metabolism	Phenylalanine, tyrosine and tryptophan biosynthesis	0.000101102
NC	AceBT8.Label	Metabolism	Amino acid metabolism	Phenylalanine, tyrosine and tryptophan biosynthesis	0
NC	GluT4.Label	Metabolism	Amino acid metabolism	Phenylalanine, tyrosine and tryptophan biosynthesis	0
NC	GluT6.Label	Metabolism	Amino acid metabolism	Phenylalanine, tyrosine and tryptophan biosynthesis	0
NC	GluT8.Label	Metabolism	Amino acid metabolism	Phenylalanine, tyrosine and tryptophan biosynthesis	0
NC	L13T4.Label	Metabolism	Amino acid metabolism	Phenylalanine, tyrosine and tryptophan biosynthesis	0
NC	L13T6.Label	Metabolism	Amino acid metabolism	Phenylalanine, tyrosine and tryptophan biosynthesis	0
NC	L13T8.Label	Metabolism	Amino acid metabolism	Phenylalanine, tyrosine and tryptophan biosynthesis	0
NC	AceBT4.Label	Metabolism	Amino acid metabolism	Phenylalanine metabolism	0
NC	AceBT6.Label	Metabolism	Amino acid metabolism	Phenylalanine metabolism	0
NC	AceBT8.Label	Metabolism	Amino acid metabolism	Phenylalanine metabolism	0
NC	GluT4.Label	Metabolism	Amino acid metabolism	Phenylalanine metabolism	0
NC	GluT6.Label	Metabolism	Amino acid metabolism	Phenylalanine metabolism	0
NC	GluT8.Label	Metabolism	Amino acid metabolism	Phenylalanine metabolism	0
NC	L13T4.Label	Metabolism	Amino acid metabolism	Phenylalanine metabolism	0
NC	L13T6.Label	Metabolism	Amino acid metabolism	Phenylalanine metabolism	0
NC	L13T8.Label	Metabolism	Amino acid metabolism	Phenylalanine metabolism	0.000140865
NC	AceBT4.Label	Metabolism	Amino acid metabolism	Tryptophan metabolism	0
NC	AceBT6.Label	Metabolism	Amino acid metabolism	Tryptophan metabolism	0
NC	AceBT8.Label	Metabolism	Amino acid metabolism	Tryptophan metabolism	0
NC	GluT4.Label	Metabolism	Amino acid metabolism	Tryptophan metabolism	0
NC	GluT6.Label	Metabolism	Amino acid metabolism	Tryptophan metabolism	0
NC	GluT8.Label	Metabolism	Amino acid metabolism	Tryptophan metabolism	0
NC	L13T4.Label	Metabolism	Amino acid metabolism	Tryptophan metabolism	0
NC	L13T6.Label	Metabolism	Amino acid metabolism	Tryptophan metabolism	0
NC	L13T8.Label	Metabolism	Amino acid metabolism	Tryptophan metabolism	0.000140865
cyano	AceBT4.Label	Metabolism	Amino acid metabolism	Tyrosine metabolism	0
cyano	AceBT6.Label	Metabolism	Amino acid metabolism	Tyrosine metabolism	0.000202204
cyano	AceBT8.Label	Metabolism	Amino acid metabolism	Tyrosine metabolism	0
cyano	GluT4.Label	Metabolism	Amino acid metabolism	Tyrosine metabolism	0
cyano	GluT6.Label	Metabolism	Amino acid metabolism	Tyrosine metabolism	0.000137855
cyano	GluT8.Label	Metabolism	Amino acid metabolism	Tyrosine metabolism	0.000388651
cyano	L13T4.Label	Metabolism	Amino acid metabolism	Tyrosine metabolism	0
cyano	L13T6.Label	Metabolism	Amino acid metabolism	Tyrosine metabolism	0
cyano	L13T8.Label	Metabolism	Amino acid metabolism	Tyrosine metabolism	0.000986055
cyano	AceBT4.Label	Metabolism	Amino acid metabolism	Valine, leucine and isoleucine biosynthesis	0
cyano	AceBT6.Label	Metabolism	Amino acid metabolism	Valine, leucine and isoleucine biosynthesis	0.000202204
cyano	AceBT8.Label	Metabolism	Amino acid metabolism	Valine, leucine and isoleucine biosynthesis	8.44e-05
cyano	GluT4.Label	Metabolism	Amino acid metabolism	Valine, leucine and isoleucine biosynthesis	0
cyano	GluT6.Label	Metabolism	Amino acid metabolism	Valine, leucine and isoleucine biosynthesis	0.000137855
cyano	GluT8.Label	Metabolism	Amino acid metabolism	Valine, leucine and isoleucine biosynthesis	0.000259101
cyano	L13T4.Label	Metabolism	Amino acid metabolism	Valine, leucine and isoleucine biosynthesis	0
cyano	L13T6.Label	Metabolism	Amino acid metabolism	Valine, leucine and isoleucine biosynthesis	0
cyano	L13T8.Label	Metabolism	Amino acid metabolism	Valine, leucine and isoleucine biosynthesis	0.00140865
NC	AceBT4.Label	Metabolism	Amino acid metabolism	Valine, leucine and isoleucine biosynthesis	0
NC	AceBT6.Label	Metabolism	Amino acid metabolism	Valine, leucine and isoleucine biosynthesis	0
NC	AceBT8.Label	Metabolism	Amino acid metabolism	Valine, leucine and isoleucine biosynthesis	0
NC	GluT4.Label	Metabolism	Amino acid metabolism	Valine, leucine and isoleucine biosynthesis	0.000109902
NC	GluT6.Label	Metabolism	Amino acid metabolism	Valine, leucine and isoleucine biosynthesis	0
NC	GluT8.Label	Metabolism	Amino acid metabolism	Valine, leucine and isoleucine biosynthesis	0.00012955
NC	L13T4.Label	Metabolism	Amino acid metabolism	Valine, leucine and isoleucine biosynthesis	0
NC	L13T6.Label	Metabolism	Amino acid metabolism	Valine, leucine and isoleucine biosynthesis	0
NC	L13T8.Label	Metabolism	Amino acid metabolism	Valine, leucine and isoleucine biosynthesis	0
cyano	AceBT4.Label	Metabolism	Amino acid metabolism	Valine, leucine and isoleucine degradation	0
cyano	AceBT6.Label	Metabolism	Amino acid metabolism	Valine, leucine and isoleucine degradation	0
cyano	AceBT8.Label	Metabolism	Amino acid metabolism	Valine, leucine and isoleucine degradation	0
cyano	GluT4.Label	Metabolism	Amino acid metabolism	Valine, leucine and isoleucine degradation	0
cyano	GluT6.Label	Metabolism	Amino acid metabolism	Valine, leucine and isoleucine degradation	0
cyano	GluT8.Label	Metabolism	Amino acid metabolism	Valine, leucine and isoleucine degradation	0
cyano	L13T4.Label	Metabolism	Amino acid metabolism	Valine, leucine and isoleucine degradation	0
cyano	L13T6.Label	Metabolism	Amino acid metabolism	Valine, leucine and isoleucine degradation	0
cyano	L13T8.Label	Metabolism	Amino acid metabolism	Valine, leucine and isoleucine degradation	0.000140865
NC	AceBT4.Label	Metabolism	Amino acid metabolism	Valine, leucine and isoleucine degradation	0
NC	AceBT6.Label	Metabolism	Amino acid metabolism	Valine, leucine and isoleucine degradation	0
NC	AceBT8.Label	Metabolism	Amino acid metabolism	Valine, leucine and isoleucine degradation	0
NC	GluT4.Label	Metabolism	Amino acid metabolism	Valine, leucine and isoleucine degradation	0
NC	GluT6.Label	Metabolism	Amino acid metabolism	Valine, leucine and isoleucine degradation	0.00027571
NC	GluT8.Label	Metabolism	Amino acid metabolism	Valine, leucine and isoleucine degradation	0
NC	L13T4.Label	Metabolism	Amino acid metabolism	Valine, leucine and isoleucine degradation	0
NC	L13T6.Label	Metabolism	Amino acid metabolism	Valine, leucine and isoleucine degradation	0
NC	L13T8.Label	Metabolism	Amino acid metabolism	Valine, leucine and isoleucine degradation	0
NC	AceBT4.Label	Metabolism	Biosynthesis of other secondary metabolites	Phenylpropanoid biosynthesis	0
NC	AceBT6.Label	Metabolism	Biosynthesis of other secondary metabolites	Phenylpropanoid biosynthesis	0
NC	AceBT8.Label	Metabolism	Biosynthesis of other secondary metabolites	Phenylpropanoid biosynthesis	0
NC	GluT4.Label	Metabolism	Biosynthesis of other secondary metabolites	Phenylpropanoid biosynthesis	0
NC	GluT6.Label	Metabolism	Biosynthesis of other secondary metabolites	Phenylpropanoid biosynthesis	0
NC	GluT8.Label	Metabolism	Biosynthesis of other secondary metabolites	Phenylpropanoid biosynthesis	0
NC	L13T4.Label	Metabolism	Biosynthesis of other secondary metabolites	Phenylpropanoid biosynthesis	0
NC	L13T6.Label	Metabolism	Biosynthesis of other secondary metabolites	Phenylpropanoid biosynthesis	0
NC	L13T8.Label	Metabolism	Biosynthesis of other secondary metabolites	Phenylpropanoid biosynthesis	0.000140865
cyano	AceBT4.Label	Metabolism	Biosynthesis of other secondary metabolites	Streptomycin biosynthesis	0
cyano	AceBT6.Label	Metabolism	Biosynthesis of other secondary metabolites	Streptomycin biosynthesis	0
cyano	AceBT8.Label	Metabolism	Biosynthesis of other secondary metabolites	Streptomycin biosynthesis	8.44e-05
cyano	GluT4.Label	Metabolism	Biosynthesis of other secondary metabolites	Streptomycin biosynthesis	0
cyano	GluT6.Label	Metabolism	Biosynthesis of other secondary metabolites	Streptomycin biosynthesis	0.000137855
cyano	GluT8.Label	Metabolism	Biosynthesis of other secondary metabolites	Streptomycin biosynthesis	0.000388651
cyano	L13T4.Label	Metabolism	Biosynthesis of other secondary metabolites	Streptomycin biosynthesis	0
cyano	L13T6.Label	Metabolism	Biosynthesis of other secondary metabolites	Streptomycin biosynthesis	0
cyano	L13T8.Label	Metabolism	Biosynthesis of other secondary metabolites	Streptomycin biosynthesis	0.00084519
cyano	AceBT4.Label	Metabolism	Carbohydrate metabolism	Amino sugar and nucleotide sugar metabolism	0
cyano	AceBT6.Label	Metabolism	Carbohydrate metabolism	Amino sugar and nucleotide sugar metabolism	0
cyano	AceBT8.Label	Metabolism	Carbohydrate metabolism	Amino sugar and nucleotide sugar metabolism	0.0001688
cyano	GluT4.Label	Metabolism	Carbohydrate metabolism	Amino sugar and nucleotide sugar metabolism	0.000109902
cyano	GluT6.Label	Metabolism	Carbohydrate metabolism	Amino sugar and nucleotide sugar metabolism	0.00027571
cyano	GluT8.Label	Metabolism	Carbohydrate metabolism	Amino sugar and nucleotide sugar metabolism	0.00116595
cyano	L13T4.Label	Metabolism	Carbohydrate metabolism	Amino sugar and nucleotide sugar metabolism	0.000118582
cyano	L13T6.Label	Metabolism	Carbohydrate metabolism	Amino sugar and nucleotide sugar metabolism	0
cyano	L13T8.Label	Metabolism	Carbohydrate metabolism	Amino sugar and nucleotide sugar metabolism	0.00211298
NC	AceBT4.Label	Metabolism	Carbohydrate metabolism	Amino sugar and nucleotide sugar metabolism	0
NC	AceBT6.Label	Metabolism	Carbohydrate metabolism	Amino sugar and nucleotide sugar metabolism	0
NC	AceBT8.Label	Metabolism	Carbohydrate metabolism	Amino sugar and nucleotide sugar metabolism	0
NC	GluT4.Label	Metabolism	Carbohydrate metabolism	Amino sugar and nucleotide sugar metabolism	0
NC	GluT6.Label	Metabolism	Carbohydrate metabolism	Amino sugar and nucleotide sugar metabolism	0.000137855
NC	GluT8.Label	Metabolism	Carbohydrate metabolism	Amino sugar and nucleotide sugar metabolism	0.0002591
NC	L13T4.Label	Metabolism	Carbohydrate metabolism	Amino sugar and nucleotide sugar metabolism	0
NC	L13T6.Label	Metabolism	Carbohydrate metabolism	Amino sugar and nucleotide sugar metabolism	0
NC	L13T8.Label	Metabolism	Carbohydrate metabolism	Amino sugar and nucleotide sugar metabolism	0
cyano	AceBT4.Label	Metabolism	Carbohydrate metabolism	Ascorbate and aldarate metabolism	0
cyano	AceBT6.Label	Metabolism	Carbohydrate metabolism	Ascorbate and aldarate metabolism	0
cyano	AceBT8.Label	Metabolism	Carbohydrate metabolism	Ascorbate and aldarate metabolism	0
cyano	GluT4.Label	Metabolism	Carbohydrate metabolism	Ascorbate and aldarate metabolism	0
cyano	GluT6.Label	Metabolism	Carbohydrate metabolism	Ascorbate and aldarate metabolism	0.000137855
cyano	GluT8.Label	Metabolism	Carbohydrate metabolism	Ascorbate and aldarate metabolism	0.00012955
cyano	L13T4.Label	Metabolism	Carbohydrate metabolism	Ascorbate and aldarate metabolism	0
cyano	L13T6.Label	Metabolism	Carbohydrate metabolism	Ascorbate and aldarate metabolism	0
cyano	L13T8.Label	Metabolism	Carbohydrate metabolism	Ascorbate and aldarate metabolism	0.000140865
cyano	AceBT4.Label	Metabolism	Carbohydrate metabolism	Butanoate metabolism	0
cyano	AceBT6.Label	Metabolism	Carbohydrate metabolism	Butanoate metabolism	0.000202204
cyano	AceBT8.Label	Metabolism	Carbohydrate metabolism	Butanoate metabolism	0
cyano	GluT4.Label	Metabolism	Carbohydrate metabolism	Butanoate metabolism	0
cyano	GluT6.Label	Metabolism	Carbohydrate metabolism	Butanoate metabolism	0.000137855
cyano	GluT8.Label	Metabolism	Carbohydrate metabolism	Butanoate metabolism	0.000388651
cyano	L13T4.Label	Metabolism	Carbohydrate metabolism	Butanoate metabolism	0
cyano	L13T6.Label	Metabolism	Carbohydrate metabolism	Butanoate metabolism	0
cyano	L13T8.Label	Metabolism	Carbohydrate metabolism	Butanoate metabolism	0.000986055
NC	AceBT4.Label	Metabolism	Carbohydrate metabolism	Butanoate metabolism	0
NC	AceBT6.Label	Metabolism	Carbohydrate metabolism	Butanoate metabolism	0.000101102
NC	AceBT8.Label	Metabolism	Carbohydrate metabolism	Butanoate metabolism	0
NC	GluT4.Label	Metabolism	Carbohydrate metabolism	Butanoate metabolism	0
NC	GluT6.Label	Metabolism	Carbohydrate metabolism	Butanoate metabolism	0
NC	GluT8.Label	Metabolism	Carbohydrate metabolism	Butanoate metabolism	0
NC	L13T4.Label	Metabolism	Carbohydrate metabolism	Butanoate metabolism	0
NC	L13T6.Label	Metabolism	Carbohydrate metabolism	Butanoate metabolism	0
NC	L13T8.Label	Metabolism	Carbohydrate metabolism	Butanoate metabolism	0
cyano	AceBT4.Label	Metabolism	Carbohydrate metabolism	C5Branched dibasic acid metabolism	0
cyano	AceBT6.Label	Metabolism	Carbohydrate metabolism	C5Branched dibasic acid metabolism	0
cyano	AceBT8.Label	Metabolism	Carbohydrate metabolism	C5Branched dibasic acid metabolism	0
cyano	GluT4.Label	Metabolism	Carbohydrate metabolism	C5Branched dibasic acid metabolism	0
cyano	GluT6.Label	Metabolism	Carbohydrate metabolism	C5Branched dibasic acid metabolism	0
cyano	GluT8.Label	Metabolism	Carbohydrate metabolism	C5Branched dibasic acid metabolism	0
cyano	L13T4.Label	Metabolism	Carbohydrate metabolism	C5Branched dibasic acid metabolism	0
cyano	L13T6.Label	Metabolism	Carbohydrate metabolism	C5Branched dibasic acid metabolism	0
cyano	L13T8.Label	Metabolism	Carbohydrate metabolism	C5Branched dibasic acid metabolism	0.000140865
cyano	AceBT4.Label	Metabolism	Carbohydrate metabolism	Citrate cycle (TCA cycle)	0.000128419
cyano	AceBT6.Label	Metabolism	Carbohydrate metabolism	Citrate cycle (TCA cycle)	0.000101102
cyano	AceBT8.Label	Metabolism	Carbohydrate metabolism	Citrate cycle (TCA cycle)	0
cyano	GluT4.Label	Metabolism	Carbohydrate metabolism	Citrate cycle (TCA cycle)	0
cyano	GluT6.Label	Metabolism	Carbohydrate metabolism	Citrate cycle (TCA cycle)	0
cyano	GluT8.Label	Metabolism	Carbohydrate metabolism	Citrate cycle (TCA cycle)	0.000647752
cyano	L13T4.Label	Metabolism	Carbohydrate metabolism	Citrate cycle (TCA cycle)	0
cyano	L13T6.Label	Metabolism	Carbohydrate metabolism	Citrate cycle (TCA cycle)	0
cyano	L13T8.Label	Metabolism	Carbohydrate metabolism	Citrate cycle (TCA cycle)	0.00154951
NC	AceBT4.Label	Metabolism	Carbohydrate metabolism	Citrate cycle (TCA cycle)	0
NC	AceBT6.Label	Metabolism	Carbohydrate metabolism	Citrate cycle (TCA cycle)	0.000101102
NC	AceBT8.Label	Metabolism	Carbohydrate metabolism	Citrate cycle (TCA cycle)	0
NC	GluT4.Label	Metabolism	Carbohydrate metabolism	Citrate cycle (TCA cycle)	0.000219804
NC	GluT6.Label	Metabolism	Carbohydrate metabolism	Citrate cycle (TCA cycle)	0.000413565
NC	GluT8.Label	Metabolism	Carbohydrate metabolism	Citrate cycle (TCA cycle)	0.00012955
NC	L13T4.Label	Metabolism	Carbohydrate metabolism	Citrate cycle (TCA cycle)	0
NC	L13T6.Label	Metabolism	Carbohydrate metabolism	Citrate cycle (TCA cycle)	0
NC	L13T8.Label	Metabolism	Carbohydrate metabolism	Citrate cycle (TCA cycle)	0
cyano	AceBT4.Label	Metabolism	Carbohydrate metabolism	Fructose and mannose metabolism	0.000385257
cyano	AceBT6.Label	Metabolism	Carbohydrate metabolism	Fructose and mannose metabolism	0.00101102
cyano	AceBT8.Label	Metabolism	Carbohydrate metabolism	Fructose and mannose metabolism	0.00134998
cyano	GluT4.Label	Metabolism	Carbohydrate metabolism	Fructose and mannose metabolism	0.000219804
cyano	GluT6.Label	Metabolism	Carbohydrate metabolism	Fructose and mannose metabolism	0.000689275
cyano	GluT8.Label	Metabolism	Carbohydrate metabolism	Fructose and mannose metabolism	0.00310921
cyano	L13T4.Label	Metabolism	Carbohydrate metabolism	Fructose and mannose metabolism	0.000711491
cyano	L13T6.Label	Metabolism	Carbohydrate metabolism	Fructose and mannose metabolism	0
cyano	L13T8.Label	Metabolism	Carbohydrate metabolism	Fructose and mannose metabolism	0.00591633
NC	AceBT4.Label	Metabolism	Carbohydrate metabolism	Fructose and mannose metabolism	0
NC	AceBT6.Label	Metabolism	Carbohydrate metabolism	Fructose and mannose metabolism	0.000202204
NC	AceBT8.Label	Metabolism	Carbohydrate metabolism	Fructose and mannose metabolism	0
NC	GluT4.Label	Metabolism	Carbohydrate metabolism	Fructose and mannose metabolism	0
NC	GluT6.Label	Metabolism	Carbohydrate metabolism	Fructose and mannose metabolism	0
NC	GluT8.Label	Metabolism	Carbohydrate metabolism	Fructose and mannose metabolism	0.000388651
NC	L13T4.Label	Metabolism	Carbohydrate metabolism	Fructose and mannose metabolism	0.000118582
NC	L13T6.Label	Metabolism	Carbohydrate metabolism	Fructose and mannose metabolism	0.000205128
NC	L13T8.Label	Metabolism	Carbohydrate metabolism	Fructose and mannose metabolism	0.000140865
cyano	AceBT4.Label	Metabolism	Carbohydrate metabolism	Galactose metabolism	0
cyano	AceBT6.Label	Metabolism	Carbohydrate metabolism	Galactose metabolism	0
cyano	AceBT8.Label	Metabolism	Carbohydrate metabolism	Galactose metabolism	8.44e-05
cyano	GluT4.Label	Metabolism	Carbohydrate metabolism	Galactose metabolism	0
cyano	GluT6.Label	Metabolism	Carbohydrate metabolism	Galactose metabolism	0.000137855
cyano	GluT8.Label	Metabolism	Carbohydrate metabolism	Galactose metabolism	0.000388651
cyano	L13T4.Label	Metabolism	Carbohydrate metabolism	Galactose metabolism	0
cyano	L13T6.Label	Metabolism	Carbohydrate metabolism	Galactose metabolism	0
cyano	L13T8.Label	Metabolism	Carbohydrate metabolism	Galactose metabolism	0.000422595
NC	AceBT4.Label	Metabolism	Carbohydrate metabolism	Galactose metabolism	0
NC	AceBT6.Label	Metabolism	Carbohydrate metabolism	Galactose metabolism	0
NC	AceBT8.Label	Metabolism	Carbohydrate metabolism	Galactose metabolism	0
NC	GluT4.Label	Metabolism	Carbohydrate metabolism	Galactose metabolism	0
NC	GluT6.Label	Metabolism	Carbohydrate metabolism	Galactose metabolism	0
NC	GluT8.Label	Metabolism	Carbohydrate metabolism	Galactose metabolism	0.000259101
NC	L13T4.Label	Metabolism	Carbohydrate metabolism	Galactose metabolism	0
NC	L13T6.Label	Metabolism	Carbohydrate metabolism	Galactose metabolism	0.000205128
NC	L13T8.Label	Metabolism	Carbohydrate metabolism	Galactose metabolism	0
cyano	AceBT4.Label	Metabolism	Carbohydrate metabolism	Glycolysis / Gluconeogenesis	0.000385257
cyano	AceBT6.Label	Metabolism	Carbohydrate metabolism	Glycolysis / Gluconeogenesis	0.00192094
cyano	AceBT8.Label	Metabolism	Carbohydrate metabolism	Glycolysis / Gluconeogenesis	0.00194068
cyano	GluT4.Label	Metabolism	Carbohydrate metabolism	Glycolysis / Gluconeogenesis	0.000219804
cyano	GluT6.Label	Metabolism	Carbohydrate metabolism	Glycolysis / Gluconeogenesis	0.00165426
cyano	GluT8.Label	Metabolism	Carbohydrate metabolism	Glycolysis / Gluconeogenesis	0.00595932
cyano	L13T4.Label	Metabolism	Carbohydrate metabolism	Glycolysis / Gluconeogenesis	0.000948655
cyano	L13T6.Label	Metabolism	Carbohydrate metabolism	Glycolysis / Gluconeogenesis	0
cyano	L13T8.Label	Metabolism	Carbohydrate metabolism	Glycolysis / Gluconeogenesis	0.01465
NC	AceBT4.Label	Metabolism	Carbohydrate metabolism	Glycolysis / Gluconeogenesis	0
NC	AceBT6.Label	Metabolism	Carbohydrate metabolism	Glycolysis / Gluconeogenesis	0.00050551
NC	AceBT8.Label	Metabolism	Carbohydrate metabolism	Glycolysis / Gluconeogenesis	0
NC	GluT4.Label	Metabolism	Carbohydrate metabolism	Glycolysis / Gluconeogenesis	0.000219804
NC	GluT6.Label	Metabolism	Carbohydrate metabolism	Glycolysis / Gluconeogenesis	0.000137855
NC	GluT8.Label	Metabolism	Carbohydrate metabolism	Glycolysis / Gluconeogenesis	0.000259101
NC	L13T4.Label	Metabolism	Carbohydrate metabolism	Glycolysis / Gluconeogenesis	0.000118582
NC	L13T6.Label	Metabolism	Carbohydrate metabolism	Glycolysis / Gluconeogenesis	0.000205128
NC	L13T8.Label	Metabolism	Carbohydrate metabolism	Glycolysis / Gluconeogenesis	0.000140865
cyano	AceBT4.Label	Metabolism	Carbohydrate metabolism	Glyoxylate and dicarboxylate metabolism	0.00102735
cyano	AceBT6.Label	Metabolism	Carbohydrate metabolism	Glyoxylate and dicarboxylate metabolism	0.000101102
cyano	AceBT8.Label	Metabolism	Carbohydrate metabolism	Glyoxylate and dicarboxylate metabolism	0.000506244
cyano	GluT4.Label	Metabolism	Carbohydrate metabolism	Glyoxylate and dicarboxylate metabolism	0.000109902
cyano	GluT6.Label	Metabolism	Carbohydrate metabolism	Glyoxylate and dicarboxylate metabolism	0.00027571
cyano	GluT8.Label	Metabolism	Carbohydrate metabolism	Glyoxylate and dicarboxylate metabolism	0.00285011
cyano	L13T4.Label	Metabolism	Carbohydrate metabolism	Glyoxylate and dicarboxylate metabolism	0
cyano	L13T6.Label	Metabolism	Carbohydrate metabolism	Glyoxylate and dicarboxylate metabolism	0.000410256
cyano	L13T8.Label	Metabolism	Carbohydrate metabolism	Glyoxylate and dicarboxylate metabolism	0.0056346
NC	AceBT4.Label	Metabolism	Carbohydrate metabolism	Glyoxylate and dicarboxylate metabolism	0
NC	AceBT6.Label	Metabolism	Carbohydrate metabolism	Glyoxylate and dicarboxylate metabolism	0
NC	AceBT8.Label	Metabolism	Carbohydrate metabolism	Glyoxylate and dicarboxylate metabolism	8.44e-05
NC	GluT4.Label	Metabolism	Carbohydrate metabolism	Glyoxylate and dicarboxylate metabolism	0
NC	GluT6.Label	Metabolism	Carbohydrate metabolism	Glyoxylate and dicarboxylate metabolism	0.000413565
NC	GluT8.Label	Metabolism	Carbohydrate metabolism	Glyoxylate and dicarboxylate metabolism	0
NC	L13T4.Label	Metabolism	Carbohydrate metabolism	Glyoxylate and dicarboxylate metabolism	0.000118582
NC	L13T6.Label	Metabolism	Carbohydrate metabolism	Glyoxylate and dicarboxylate metabolism	0
NC	L13T8.Label	Metabolism	Carbohydrate metabolism	Glyoxylate and dicarboxylate metabolism	0.000140865
cyano	AceBT4.Label	Metabolism	Carbohydrate metabolism	Inositol phosphate metabolism	0
cyano	AceBT6.Label	Metabolism	Carbohydrate metabolism	Inositol phosphate metabolism	0.000101102
cyano	AceBT8.Label	Metabolism	Carbohydrate metabolism	Inositol phosphate metabolism	0
cyano	GluT4.Label	Metabolism	Carbohydrate metabolism	Inositol phosphate metabolism	0
cyano	GluT6.Label	Metabolism	Carbohydrate metabolism	Inositol phosphate metabolism	0
cyano	GluT8.Label	Metabolism	Carbohydrate metabolism	Inositol phosphate metabolism	0
cyano	L13T4.Label	Metabolism	Carbohydrate metabolism	Inositol phosphate metabolism	0
cyano	L13T6.Label	Metabolism	Carbohydrate metabolism	Inositol phosphate metabolism	0
cyano	L13T8.Label	Metabolism	Carbohydrate metabolism	Inositol phosphate metabolism	0.000422595
cyano	AceBT4.Label	Metabolism	Carbohydrate metabolism	Pentose and glucuronate interconversions	0
cyano	AceBT6.Label	Metabolism	Carbohydrate metabolism	Pentose and glucuronate interconversions	0
cyano	AceBT8.Label	Metabolism	Carbohydrate metabolism	Pentose and glucuronate interconversions	0.000168748
cyano	GluT4.Label	Metabolism	Carbohydrate metabolism	Pentose and glucuronate interconversions	0
cyano	GluT6.Label	Metabolism	Carbohydrate metabolism	Pentose and glucuronate interconversions	0.000413565
cyano	GluT8.Label	Metabolism	Carbohydrate metabolism	Pentose and glucuronate interconversions	0.000388651
cyano	L13T4.Label	Metabolism	Carbohydrate metabolism	Pentose and glucuronate interconversions	0.000118582
cyano	L13T6.Label	Metabolism	Carbohydrate metabolism	Pentose and glucuronate interconversions	0
cyano	L13T8.Label	Metabolism	Carbohydrate metabolism	Pentose and glucuronate interconversions	0.00126779
cyano	AceBT4.Label	Metabolism	Carbohydrate metabolism	Pentose phosphate pathway	0.000385257
cyano	AceBT6.Label	Metabolism	Carbohydrate metabolism	Pentose phosphate pathway	0.00171873
cyano	AceBT8.Label	Metabolism	Carbohydrate metabolism	Pentose phosphate pathway	0.00261567
cyano	GluT4.Label	Metabolism	Carbohydrate metabolism	Pentose phosphate pathway	0.000219804
cyano	GluT6.Label	Metabolism	Carbohydrate metabolism	Pentose phosphate pathway	0.00234353
cyano	GluT8.Label	Metabolism	Carbohydrate metabolism	Pentose phosphate pathway	0.00557067
cyano	L13T4.Label	Metabolism	Carbohydrate metabolism	Pentose phosphate pathway	0.000711491
cyano	L13T6.Label	Metabolism	Carbohydrate metabolism	Pentose phosphate pathway	0.000205128
cyano	L13T8.Label	Metabolism	Carbohydrate metabolism	Pentose phosphate pathway	0.0128187
NC	AceBT4.Label	Metabolism	Carbohydrate metabolism	Pentose phosphate pathway	0
NC	AceBT6.Label	Metabolism	Carbohydrate metabolism	Pentose phosphate pathway	0.000202204
NC	AceBT8.Label	Metabolism	Carbohydrate metabolism	Pentose phosphate pathway	0
NC	GluT4.Label	Metabolism	Carbohydrate metabolism	Pentose phosphate pathway	0
NC	GluT6.Label	Metabolism	Carbohydrate metabolism	Pentose phosphate pathway	0
NC	GluT8.Label	Metabolism	Carbohydrate metabolism	Pentose phosphate pathway	0.000259101
NC	L13T4.Label	Metabolism	Carbohydrate metabolism	Pentose phosphate pathway	0.000118582
NC	L13T6.Label	Metabolism	Carbohydrate metabolism	Pentose phosphate pathway	0.000205128
NC	L13T8.Label	Metabolism	Carbohydrate metabolism	Pentose phosphate pathway	0.000140865
cyano	AceBT4.Label	Metabolism	Carbohydrate metabolism	Propanoate metabolism	0
cyano	AceBT6.Label	Metabolism	Carbohydrate metabolism	Propanoate metabolism	0
cyano	AceBT8.Label	Metabolism	Carbohydrate metabolism	Propanoate metabolism	0
cyano	GluT4.Label	Metabolism	Carbohydrate metabolism	Propanoate metabolism	0
cyano	GluT6.Label	Metabolism	Carbohydrate metabolism	Propanoate metabolism	0
cyano	GluT8.Label	Metabolism	Carbohydrate metabolism	Propanoate metabolism	0
cyano	L13T4.Label	Metabolism	Carbohydrate metabolism	Propanoate metabolism	0
cyano	L13T6.Label	Metabolism	Carbohydrate metabolism	Propanoate metabolism	0
cyano	L13T8.Label	Metabolism	Carbohydrate metabolism	Propanoate metabolism	0.00028173
NC	AceBT4.Label	Metabolism	Carbohydrate metabolism	Propanoate metabolism	0
NC	AceBT6.Label	Metabolism	Carbohydrate metabolism	Propanoate metabolism	0
NC	AceBT8.Label	Metabolism	Carbohydrate metabolism	Propanoate metabolism	0
NC	GluT4.Label	Metabolism	Carbohydrate metabolism	Propanoate metabolism	0.000109902
NC	GluT6.Label	Metabolism	Carbohydrate metabolism	Propanoate metabolism	0.00027571
NC	GluT8.Label	Metabolism	Carbohydrate metabolism	Propanoate metabolism	0
NC	L13T4.Label	Metabolism	Carbohydrate metabolism	Propanoate metabolism	0
NC	L13T6.Label	Metabolism	Carbohydrate metabolism	Propanoate metabolism	0
NC	L13T8.Label	Metabolism	Carbohydrate metabolism	Propanoate metabolism	0
cyano	AceBT4.Label	Metabolism	Carbohydrate metabolism	Pyruvate metabolism	0
cyano	AceBT6.Label	Metabolism	Carbohydrate metabolism	Pyruvate metabolism	0
cyano	AceBT8.Label	Metabolism	Carbohydrate metabolism	Pyruvate metabolism	0
cyano	GluT4.Label	Metabolism	Carbohydrate metabolism	Pyruvate metabolism	0
cyano	GluT6.Label	Metabolism	Carbohydrate metabolism	Pyruvate metabolism	0
cyano	GluT8.Label	Metabolism	Carbohydrate metabolism	Pyruvate metabolism	0.00012955
cyano	L13T4.Label	Metabolism	Carbohydrate metabolism	Pyruvate metabolism	0
cyano	L13T6.Label	Metabolism	Carbohydrate metabolism	Pyruvate metabolism	0
cyano	L13T8.Label	Metabolism	Carbohydrate metabolism	Pyruvate metabolism	0.00126779
NC	AceBT4.Label	Metabolism	Carbohydrate metabolism	Pyruvate metabolism	0
NC	AceBT6.Label	Metabolism	Carbohydrate metabolism	Pyruvate metabolism	0.000101102
NC	AceBT8.Label	Metabolism	Carbohydrate metabolism	Pyruvate metabolism	8.44e-05
NC	GluT4.Label	Metabolism	Carbohydrate metabolism	Pyruvate metabolism	0.000219804
NC	GluT6.Label	Metabolism	Carbohydrate metabolism	Pyruvate metabolism	0.000137855
NC	GluT8.Label	Metabolism	Carbohydrate metabolism	Pyruvate metabolism	0
NC	L13T4.Label	Metabolism	Carbohydrate metabolism	Pyruvate metabolism	0
NC	L13T6.Label	Metabolism	Carbohydrate metabolism	Pyruvate metabolism	0
NC	L13T8.Label	Metabolism	Carbohydrate metabolism	Pyruvate metabolism	0.000140865
cyano	AceBT4.Label	Metabolism	Carbohydrate metabolism	Starch and sucrose metabolism	0
cyano	AceBT6.Label	Metabolism	Carbohydrate metabolism	Starch and sucrose metabolism	0
cyano	AceBT8.Label	Metabolism	Carbohydrate metabolism	Starch and sucrose metabolism	0.0001688
cyano	GluT4.Label	Metabolism	Carbohydrate metabolism	Starch and sucrose metabolism	0.000109902
cyano	GluT6.Label	Metabolism	Carbohydrate metabolism	Starch and sucrose metabolism	0.00027571
cyano	GluT8.Label	Metabolism	Carbohydrate metabolism	Starch and sucrose metabolism	0.0012955
cyano	L13T4.Label	Metabolism	Carbohydrate metabolism	Starch and sucrose metabolism	0.000118582
cyano	L13T6.Label	Metabolism	Carbohydrate metabolism	Starch and sucrose metabolism	0
cyano	L13T8.Label	Metabolism	Carbohydrate metabolism	Starch and sucrose metabolism	0.00140865
NC	AceBT4.Label	Metabolism	Carbohydrate metabolism	Starch and sucrose metabolism	0
NC	AceBT6.Label	Metabolism	Carbohydrate metabolism	Starch and sucrose metabolism	0
NC	AceBT8.Label	Metabolism	Carbohydrate metabolism	Starch and sucrose metabolism	0
NC	GluT4.Label	Metabolism	Carbohydrate metabolism	Starch and sucrose metabolism	0
NC	GluT6.Label	Metabolism	Carbohydrate metabolism	Starch and sucrose metabolism	0.000137855
NC	GluT8.Label	Metabolism	Carbohydrate metabolism	Starch and sucrose metabolism	0.00012955
NC	L13T4.Label	Metabolism	Carbohydrate metabolism	Starch and sucrose metabolism	0
NC	L13T6.Label	Metabolism	Carbohydrate metabolism	Starch and sucrose metabolism	0
NC	L13T8.Label	Metabolism	Carbohydrate metabolism	Starch and sucrose metabolism	0
cyano	AceBT4.Label	Metabolism	Energy metabolism	Carbon fixation in photosynthetic organisms	0.000385257
cyano	AceBT6.Label	Metabolism	Energy metabolism	Carbon fixation in photosynthetic organisms	0.00171873
cyano	AceBT8.Label	Metabolism	Energy metabolism	Carbon fixation in photosynthetic organisms	0.00219377
cyano	GluT4.Label	Metabolism	Energy metabolism	Carbon fixation in photosynthetic organisms	0.000329706
cyano	GluT6.Label	Metabolism	Energy metabolism	Carbon fixation in photosynthetic organisms	0.00179211
cyano	GluT8.Label	Metabolism	Energy metabolism	Carbon fixation in photosynthetic organisms	0.00647752
cyano	L13T4.Label	Metabolism	Energy metabolism	Carbon fixation in photosynthetic organisms	0.000948655
cyano	L13T6.Label	Metabolism	Energy metabolism	Carbon fixation in photosynthetic organisms	0.000410256
cyano	L13T8.Label	Metabolism	Energy metabolism	Carbon fixation in photosynthetic organisms	0.0149317
NC	AceBT4.Label	Metabolism	Energy metabolism	Carbon fixation in photosynthetic organisms	0
NC	AceBT6.Label	Metabolism	Energy metabolism	Carbon fixation in photosynthetic organisms	0.000404408
NC	AceBT8.Label	Metabolism	Energy metabolism	Carbon fixation in photosynthetic organisms	0
NC	GluT4.Label	Metabolism	Energy metabolism	Carbon fixation in photosynthetic organisms	0.000109902
NC	GluT6.Label	Metabolism	Energy metabolism	Carbon fixation in photosynthetic organisms	0
NC	GluT8.Label	Metabolism	Energy metabolism	Carbon fixation in photosynthetic organisms	0
NC	L13T4.Label	Metabolism	Energy metabolism	Carbon fixation in photosynthetic organisms	0.000118582
NC	L13T6.Label	Metabolism	Energy metabolism	Carbon fixation in photosynthetic organisms	0
NC	L13T8.Label	Metabolism	Energy metabolism	Carbon fixation in photosynthetic organisms	0.000140865
cyano	AceBT4.Label	Metabolism	Energy metabolism	Carbon fixation pathways in prokaryotes	0.000128419
cyano	AceBT6.Label	Metabolism	Energy metabolism	Carbon fixation pathways in prokaryotes	0.000101102
cyano	AceBT8.Label	Metabolism	Energy metabolism	Carbon fixation pathways in prokaryotes	0
cyano	GluT4.Label	Metabolism	Energy metabolism	Carbon fixation pathways in prokaryotes	0
cyano	GluT6.Label	Metabolism	Energy metabolism	Carbon fixation pathways in prokaryotes	0
cyano	GluT8.Label	Metabolism	Energy metabolism	Carbon fixation pathways in prokaryotes	0.000647752
cyano	L13T4.Label	Metabolism	Energy metabolism	Carbon fixation pathways in prokaryotes	0
cyano	L13T6.Label	Metabolism	Energy metabolism	Carbon fixation pathways in prokaryotes	0
cyano	L13T8.Label	Metabolism	Energy metabolism	Carbon fixation pathways in prokaryotes	0.00169038
NC	AceBT4.Label	Metabolism	Energy metabolism	Carbon fixation pathways in prokaryotes	0
NC	AceBT6.Label	Metabolism	Energy metabolism	Carbon fixation pathways in prokaryotes	0.000101102
NC	AceBT8.Label	Metabolism	Energy metabolism	Carbon fixation pathways in prokaryotes	0
NC	GluT4.Label	Metabolism	Energy metabolism	Carbon fixation pathways in prokaryotes	0.000219804
NC	GluT6.Label	Metabolism	Energy metabolism	Carbon fixation pathways in prokaryotes	0.000413565
NC	GluT8.Label	Metabolism	Energy metabolism	Carbon fixation pathways in prokaryotes	0.00012955
NC	L13T4.Label	Metabolism	Energy metabolism	Carbon fixation pathways in prokaryotes	0
NC	L13T6.Label	Metabolism	Energy metabolism	Carbon fixation pathways in prokaryotes	0
NC	L13T8.Label	Metabolism	Energy metabolism	Carbon fixation pathways in prokaryotes	0.000422595
cyano	AceBT4.Label	Metabolism	Energy metabolism	Methane metabolism	0.000385257
cyano	AceBT6.Label	Metabolism	Energy metabolism	Methane metabolism	0.00111212
cyano	AceBT8.Label	Metabolism	Energy metabolism	Methane metabolism	0.00143438
cyano	GluT4.Label	Metabolism	Energy metabolism	Methane metabolism	0.000219804
cyano	GluT6.Label	Metabolism	Energy metabolism	Methane metabolism	0.000964985
cyano	GluT8.Label	Metabolism	Energy metabolism	Methane metabolism	0.00401606
cyano	L13T4.Label	Metabolism	Energy metabolism	Methane metabolism	0.000711491
cyano	L13T6.Label	Metabolism	Energy metabolism	Methane metabolism	0
cyano	L13T8.Label	Metabolism	Energy metabolism	Methane metabolism	0.00901535
NC	AceBT4.Label	Metabolism	Energy metabolism	Methane metabolism	0
NC	AceBT6.Label	Metabolism	Energy metabolism	Methane metabolism	0.000303306
NC	AceBT8.Label	Metabolism	Energy metabolism	Methane metabolism	0
NC	GluT4.Label	Metabolism	Energy metabolism	Methane metabolism	0.000109902
NC	GluT6.Label	Metabolism	Energy metabolism	Methane metabolism	0
NC	GluT8.Label	Metabolism	Energy metabolism	Methane metabolism	0.000259101
NC	L13T4.Label	Metabolism	Energy metabolism	Methane metabolism	0.000118582
NC	L13T6.Label	Metabolism	Energy metabolism	Methane metabolism	0.000205128
NC	L13T8.Label	Metabolism	Energy metabolism	Methane metabolism	0.00028173
cyano	AceBT4.Label	Metabolism	Energy metabolism	Nitrogen metabolism	0.00102735
cyano	AceBT6.Label	Metabolism	Energy metabolism	Nitrogen metabolism	0.000909918
cyano	AceBT8.Label	Metabolism	Energy metabolism	Nitrogen metabolism	0.000421896
cyano	GluT4.Label	Metabolism	Energy metabolism	Nitrogen metabolism	0.000219804
cyano	GluT6.Label	Metabolism	Energy metabolism	Nitrogen metabolism	0.00124069
cyano	GluT8.Label	Metabolism	Energy metabolism	Nitrogen metabolism	0.00207281
cyano	L13T4.Label	Metabolism	Energy metabolism	Nitrogen metabolism	0
cyano	L13T6.Label	Metabolism	Energy metabolism	Nitrogen metabolism	0.000410256
cyano	L13T8.Label	Metabolism	Energy metabolism	Nitrogen metabolism	0.00253557
NC	AceBT4.Label	Metabolism	Energy metabolism	Nitrogen metabolism	0
NC	AceBT6.Label	Metabolism	Energy metabolism	Nitrogen metabolism	0
NC	AceBT8.Label	Metabolism	Energy metabolism	Nitrogen metabolism	0
NC	GluT4.Label	Metabolism	Energy metabolism	Nitrogen metabolism	0
NC	GluT6.Label	Metabolism	Energy metabolism	Nitrogen metabolism	0.000137855
NC	GluT8.Label	Metabolism	Energy metabolism	Nitrogen metabolism	0
NC	L13T4.Label	Metabolism	Energy metabolism	Nitrogen metabolism	0.000118582
NC	L13T6.Label	Metabolism	Energy metabolism	Nitrogen metabolism	0
NC	L13T8.Label	Metabolism	Energy metabolism	Nitrogen metabolism	0.000140865
cyano	AceBT4.Label	Metabolism	Energy metabolism	Oxidative phosphorylation	0
cyano	AceBT6.Label	Metabolism	Energy metabolism	Oxidative phosphorylation	0.000202204
cyano	AceBT8.Label	Metabolism	Energy metabolism	Oxidative phosphorylation	0.000253122
cyano	GluT4.Label	Metabolism	Energy metabolism	Oxidative phosphorylation	0
cyano	GluT6.Label	Metabolism	Energy metabolism	Oxidative phosphorylation	0
cyano	GluT8.Label	Metabolism	Energy metabolism	Oxidative phosphorylation	0.00142505
cyano	L13T4.Label	Metabolism	Energy metabolism	Oxidative phosphorylation	0.000474327
cyano	L13T6.Label	Metabolism	Energy metabolism	Oxidative phosphorylation	0
cyano	L13T8.Label	Metabolism	Energy metabolism	Oxidative phosphorylation	0.00929709
NC	AceBT4.Label	Metabolism	Energy metabolism	Oxidative phosphorylation	0.000128419
NC	AceBT6.Label	Metabolism	Energy metabolism	Oxidative phosphorylation	0.000101102
NC	AceBT8.Label	Metabolism	Energy metabolism	Oxidative phosphorylation	0
NC	GluT4.Label	Metabolism	Energy metabolism	Oxidative phosphorylation	0.000109902
NC	GluT6.Label	Metabolism	Energy metabolism	Oxidative phosphorylation	0
NC	GluT8.Label	Metabolism	Energy metabolism	Oxidative phosphorylation	0
NC	L13T4.Label	Metabolism	Energy metabolism	Oxidative phosphorylation	0
NC	L13T6.Label	Metabolism	Energy metabolism	Oxidative phosphorylation	0
NC	L13T8.Label	Metabolism	Energy metabolism	Oxidative phosphorylation	0.000140865
cyano	AceBT4.Label	Metabolism	Energy metabolism	Photosynthesis	0
cyano	AceBT6.Label	Metabolism	Energy metabolism	Photosynthesis	0.000303306
cyano	AceBT8.Label	Metabolism	Energy metabolism	Photosynthesis	0.000759418
cyano	GluT4.Label	Metabolism	Energy metabolism	Photosynthesis	0.000219804
cyano	GluT6.Label	Metabolism	Energy metabolism	Photosynthesis	0.000137855
cyano	GluT8.Label	Metabolism	Energy metabolism	Photosynthesis	0.00259101
cyano	L13T4.Label	Metabolism	Energy metabolism	Photosynthesis	0.000355745
cyano	L13T6.Label	Metabolism	Energy metabolism	Photosynthesis	0.000205128
cyano	L13T8.Label	Metabolism	Energy metabolism	Photosynthesis	0.0145091
NC	AceBT4.Label	Metabolism	Energy metabolism	Photosynthesis	0.000128419
NC	AceBT6.Label	Metabolism	Energy metabolism	Photosynthesis	0
NC	AceBT8.Label	Metabolism	Energy metabolism	Photosynthesis	0
NC	GluT4.Label	Metabolism	Energy metabolism	Photosynthesis	0
NC	GluT6.Label	Metabolism	Energy metabolism	Photosynthesis	0
NC	GluT8.Label	Metabolism	Energy metabolism	Photosynthesis	0
NC	L13T4.Label	Metabolism	Energy metabolism	Photosynthesis	0
NC	L13T6.Label	Metabolism	Energy metabolism	Photosynthesis	0
NC	L13T8.Label	Metabolism	Energy metabolism	Photosynthesis	0.000140865
cyano	AceBT4.Label	Metabolism	Energy metabolism	Photosynthesis antenna proteins	0
cyano	AceBT6.Label	Metabolism	Energy metabolism	Photosynthesis antenna proteins	0.000404408
cyano	AceBT8.Label	Metabolism	Energy metabolism	Photosynthesis antenna proteins	0.00185623
cyano	GluT4.Label	Metabolism	Energy metabolism	Photosynthesis antenna proteins	0.000219804
cyano	GluT6.Label	Metabolism	Energy metabolism	Photosynthesis antenna proteins	0.000137855
cyano	GluT8.Label	Metabolism	Energy metabolism	Photosynthesis antenna proteins	0.00259101
cyano	L13T4.Label	Metabolism	Energy metabolism	Photosynthesis antenna proteins	0
cyano	L13T6.Label	Metabolism	Energy metabolism	Photosynthesis antenna proteins	0
cyano	L13T8.Label	Metabolism	Energy metabolism	Photosynthesis antenna proteins	0.0176081
cyano	AceBT4.Label	Metabolism	Energy metabolism	Sulfur metabolism	0
cyano	AceBT6.Label	Metabolism	Energy metabolism	Sulfur metabolism	0
cyano	AceBT8.Label	Metabolism	Energy metabolism	Sulfur metabolism	0.000168748
cyano	GluT4.Label	Metabolism	Energy metabolism	Sulfur metabolism	0
cyano	GluT6.Label	Metabolism	Energy metabolism	Sulfur metabolism	0
cyano	GluT8.Label	Metabolism	Energy metabolism	Sulfur metabolism	0.0010364
cyano	L13T4.Label	Metabolism	Energy metabolism	Sulfur metabolism	0
cyano	L13T6.Label	Metabolism	Energy metabolism	Sulfur metabolism	0
cyano	L13T8.Label	Metabolism	Energy metabolism	Sulfur metabolism	0.00183124
cyano	AceBT4.Label	Metabolism	Glycan biosynthesis and metabolism	Peptidoglycan biosynthesis	0
cyano	AceBT6.Label	Metabolism	Glycan biosynthesis and metabolism	Peptidoglycan biosynthesis	0
cyano	AceBT8.Label	Metabolism	Glycan biosynthesis and metabolism	Peptidoglycan biosynthesis	0
cyano	GluT4.Label	Metabolism	Glycan biosynthesis and metabolism	Peptidoglycan biosynthesis	0
cyano	GluT6.Label	Metabolism	Glycan biosynthesis and metabolism	Peptidoglycan biosynthesis	0
cyano	GluT8.Label	Metabolism	Glycan biosynthesis and metabolism	Peptidoglycan biosynthesis	0.00012955
cyano	L13T4.Label	Metabolism	Glycan biosynthesis and metabolism	Peptidoglycan biosynthesis	0
cyano	L13T6.Label	Metabolism	Glycan biosynthesis and metabolism	Peptidoglycan biosynthesis	0
cyano	L13T8.Label	Metabolism	Glycan biosynthesis and metabolism	Peptidoglycan biosynthesis	0.000140865
cyano	AceBT4.Label	Metabolism	Lipid metabolism	Arachidonic acid metabolism	0
cyano	AceBT4.Label	Metabolism	Lipid metabolism	Fatty acid biosynthesis	0
cyano	AceBT4.Label	Metabolism	Lipid metabolism	Fatty acid degradation	0
cyano	AceBT4.Label	Metabolism	Lipid metabolism	Glycerolipid metabolism	0
cyano	AceBT6.Label	Metabolism	Lipid metabolism	Arachidonic acid metabolism	0.000101102
cyano	AceBT6.Label	Metabolism	Lipid metabolism	Fatty acid biosynthesis	0
cyano	AceBT6.Label	Metabolism	Lipid metabolism	Fatty acid degradation	0
cyano	AceBT6.Label	Metabolism	Lipid metabolism	Glycerolipid metabolism	0
cyano	AceBT8.Label	Metabolism	Lipid metabolism	Arachidonic acid metabolism	0.000168748
cyano	AceBT8.Label	Metabolism	Lipid metabolism	Fatty acid biosynthesis	0
cyano	AceBT8.Label	Metabolism	Lipid metabolism	Fatty acid degradation	0
cyano	AceBT8.Label	Metabolism	Lipid metabolism	Glycerolipid metabolism	0
cyano	GluT4.Label	Metabolism	Lipid metabolism	Arachidonic acid metabolism	0
cyano	GluT4.Label	Metabolism	Lipid metabolism	Fatty acid biosynthesis	0
cyano	GluT4.Label	Metabolism	Lipid metabolism	Fatty acid degradation	0
cyano	GluT4.Label	Metabolism	Lipid metabolism	Glycerolipid metabolism	0
cyano	GluT6.Label	Metabolism	Lipid metabolism	Arachidonic acid metabolism	0
cyano	GluT6.Label	Metabolism	Lipid metabolism	Fatty acid biosynthesis	0
cyano	GluT6.Label	Metabolism	Lipid metabolism	Fatty acid degradation	0
cyano	GluT6.Label	Metabolism	Lipid metabolism	Glycerolipid metabolism	0
cyano	GluT8.Label	Metabolism	Lipid metabolism	Arachidonic acid metabolism	0.000388651
cyano	GluT8.Label	Metabolism	Lipid metabolism	Fatty acid biosynthesis	0.00012955
cyano	GluT8.Label	Metabolism	Lipid metabolism	Fatty acid degradation	0.00012955
cyano	GluT8.Label	Metabolism	Lipid metabolism	Glycerolipid metabolism	0
cyano	L13T4.Label	Metabolism	Lipid metabolism	Arachidonic acid metabolism	0
cyano	L13T4.Label	Metabolism	Lipid metabolism	Fatty acid biosynthesis	0
cyano	L13T4.Label	Metabolism	Lipid metabolism	Fatty acid degradation	0
cyano	L13T4.Label	Metabolism	Lipid metabolism	Glycerolipid metabolism	0.000118582
cyano	L13T6.Label	Metabolism	Lipid metabolism	Arachidonic acid metabolism	0
cyano	L13T6.Label	Metabolism	Lipid metabolism	Fatty acid biosynthesis	0
cyano	L13T6.Label	Metabolism	Lipid metabolism	Fatty acid degradation	0
cyano	L13T6.Label	Metabolism	Lipid metabolism	Glycerolipid metabolism	0
cyano	L13T8.Label	Metabolism	Lipid metabolism	Arachidonic acid metabolism	0.00056346
cyano	L13T8.Label	Metabolism	Lipid metabolism	Fatty acid biosynthesis	0
cyano	L13T8.Label	Metabolism	Lipid metabolism	Fatty acid degradation	0.00056346
cyano	L13T8.Label	Metabolism	Lipid metabolism	Glycerolipid metabolism	0.00084519
NC	AceBT4.Label	Metabolism	Lipid metabolism	Arachidonic acid metabolism	0
NC	AceBT4.Label	Metabolism	Lipid metabolism	Fatty acid biosynthesis	0
NC	AceBT6.Label	Metabolism	Lipid metabolism	Arachidonic acid metabolism	0
NC	AceBT6.Label	Metabolism	Lipid metabolism	Fatty acid biosynthesis	0
NC	AceBT8.Label	Metabolism	Lipid metabolism	Arachidonic acid metabolism	0
NC	AceBT8.Label	Metabolism	Lipid metabolism	Fatty acid biosynthesis	0
NC	GluT4.Label	Metabolism	Lipid metabolism	Arachidonic acid metabolism	0
NC	GluT4.Label	Metabolism	Lipid metabolism	Fatty acid biosynthesis	0
NC	GluT6.Label	Metabolism	Lipid metabolism	Arachidonic acid metabolism	0
NC	GluT6.Label	Metabolism	Lipid metabolism	Fatty acid biosynthesis	0
NC	GluT8.Label	Metabolism	Lipid metabolism	Arachidonic acid metabolism	0
NC	GluT8.Label	Metabolism	Lipid metabolism	Fatty acid biosynthesis	0
NC	L13T4.Label	Metabolism	Lipid metabolism	Arachidonic acid metabolism	0
NC	L13T4.Label	Metabolism	Lipid metabolism	Fatty acid biosynthesis	0
NC	L13T6.Label	Metabolism	Lipid metabolism	Arachidonic acid metabolism	0
NC	L13T6.Label	Metabolism	Lipid metabolism	Fatty acid biosynthesis	0
NC	L13T8.Label	Metabolism	Lipid metabolism	Arachidonic acid metabolism	0.000140865
NC	L13T8.Label	Metabolism	Lipid metabolism	Fatty acid biosynthesis	0.000140865
cyano	AceBT4.Label	Metabolism	Metabolism of cofactors and vitamins	Biotin metabolism	0
cyano	AceBT6.Label	Metabolism	Metabolism of cofactors and vitamins	Biotin metabolism	0
cyano	AceBT8.Label	Metabolism	Metabolism of cofactors and vitamins	Biotin metabolism	0
cyano	GluT4.Label	Metabolism	Metabolism of cofactors and vitamins	Biotin metabolism	0
cyano	GluT6.Label	Metabolism	Metabolism of cofactors and vitamins	Biotin metabolism	0
cyano	GluT8.Label	Metabolism	Metabolism of cofactors and vitamins	Biotin metabolism	0.00012955
cyano	L13T4.Label	Metabolism	Metabolism of cofactors and vitamins	Biotin metabolism	0
cyano	L13T6.Label	Metabolism	Metabolism of cofactors and vitamins	Biotin metabolism	0
cyano	L13T8.Label	Metabolism	Metabolism of cofactors and vitamins	Biotin metabolism	0
NC	AceBT4.Label	Metabolism	Metabolism of cofactors and vitamins	Biotin metabolism	0
NC	AceBT6.Label	Metabolism	Metabolism of cofactors and vitamins	Biotin metabolism	0
NC	AceBT8.Label	Metabolism	Metabolism of cofactors and vitamins	Biotin metabolism	0
NC	GluT4.Label	Metabolism	Metabolism of cofactors and vitamins	Biotin metabolism	0
NC	GluT6.Label	Metabolism	Metabolism of cofactors and vitamins	Biotin metabolism	0
NC	GluT8.Label	Metabolism	Metabolism of cofactors and vitamins	Biotin metabolism	0
NC	L13T4.Label	Metabolism	Metabolism of cofactors and vitamins	Biotin metabolism	0
NC	L13T6.Label	Metabolism	Metabolism of cofactors and vitamins	Biotin metabolism	0
NC	L13T8.Label	Metabolism	Metabolism of cofactors and vitamins	Biotin metabolism	0.000140865
cyano	AceBT4.Label	Metabolism	Metabolism of cofactors and vitamins	Folate biosynthesis	0
cyano	AceBT6.Label	Metabolism	Metabolism of cofactors and vitamins	Folate biosynthesis	0
cyano	AceBT8.Label	Metabolism	Metabolism of cofactors and vitamins	Folate biosynthesis	0
cyano	GluT4.Label	Metabolism	Metabolism of cofactors and vitamins	Folate biosynthesis	0
cyano	GluT6.Label	Metabolism	Metabolism of cofactors and vitamins	Folate biosynthesis	0.000137855
cyano	GluT8.Label	Metabolism	Metabolism of cofactors and vitamins	Folate biosynthesis	0.00012955
cyano	L13T4.Label	Metabolism	Metabolism of cofactors and vitamins	Folate biosynthesis	0
cyano	L13T6.Label	Metabolism	Metabolism of cofactors and vitamins	Folate biosynthesis	0
cyano	L13T8.Label	Metabolism	Metabolism of cofactors and vitamins	Folate biosynthesis	0.000140865
cyano	AceBT4.Label	Metabolism	Metabolism of cofactors and vitamins	Nicotinate and nicotinamide metabolism	0
cyano	AceBT6.Label	Metabolism	Metabolism of cofactors and vitamins	Nicotinate and nicotinamide metabolism	0
cyano	AceBT8.Label	Metabolism	Metabolism of cofactors and vitamins	Nicotinate and nicotinamide metabolism	0
cyano	GluT4.Label	Metabolism	Metabolism of cofactors and vitamins	Nicotinate and nicotinamide metabolism	0
cyano	GluT6.Label	Metabolism	Metabolism of cofactors and vitamins	Nicotinate and nicotinamide metabolism	0
cyano	GluT8.Label	Metabolism	Metabolism of cofactors and vitamins	Nicotinate and nicotinamide metabolism	0.00012955
cyano	L13T4.Label	Metabolism	Metabolism of cofactors and vitamins	Nicotinate and nicotinamide metabolism	0
cyano	L13T6.Label	Metabolism	Metabolism of cofactors and vitamins	Nicotinate and nicotinamide metabolism	0
cyano	L13T8.Label	Metabolism	Metabolism of cofactors and vitamins	Nicotinate and nicotinamide metabolism	0.000140865
cyano	AceBT4.Label	Metabolism	Metabolism of cofactors and vitamins	One carbon pool by folate	0
cyano	AceBT6.Label	Metabolism	Metabolism of cofactors and vitamins	One carbon pool by folate	0
cyano	AceBT8.Label	Metabolism	Metabolism of cofactors and vitamins	One carbon pool by folate	0
cyano	GluT4.Label	Metabolism	Metabolism of cofactors and vitamins	One carbon pool by folate	0
cyano	GluT6.Label	Metabolism	Metabolism of cofactors and vitamins	One carbon pool by folate	0
cyano	GluT8.Label	Metabolism	Metabolism of cofactors and vitamins	One carbon pool by folate	0.00012955
cyano	L13T4.Label	Metabolism	Metabolism of cofactors and vitamins	One carbon pool by folate	0
cyano	L13T6.Label	Metabolism	Metabolism of cofactors and vitamins	One carbon pool by folate	0
cyano	L13T8.Label	Metabolism	Metabolism of cofactors and vitamins	One carbon pool by folate	0.00112692
cyano	AceBT4.Label	Metabolism	Metabolism of cofactors and vitamins	Pantothenate and CoA biosynthesis	0
cyano	AceBT6.Label	Metabolism	Metabolism of cofactors and vitamins	Pantothenate and CoA biosynthesis	0.000202204
cyano	AceBT8.Label	Metabolism	Metabolism of cofactors and vitamins	Pantothenate and CoA biosynthesis	8.44e-05
cyano	GluT4.Label	Metabolism	Metabolism of cofactors and vitamins	Pantothenate and CoA biosynthesis	0
cyano	GluT6.Label	Metabolism	Metabolism of cofactors and vitamins	Pantothenate and CoA biosynthesis	0.000137855
cyano	GluT8.Label	Metabolism	Metabolism of cofactors and vitamins	Pantothenate and CoA biosynthesis	0.000259101
cyano	L13T4.Label	Metabolism	Metabolism of cofactors and vitamins	Pantothenate and CoA biosynthesis	0
cyano	L13T6.Label	Metabolism	Metabolism of cofactors and vitamins	Pantothenate and CoA biosynthesis	0
cyano	L13T8.Label	Metabolism	Metabolism of cofactors and vitamins	Pantothenate and CoA biosynthesis	0.00126778
NC	AceBT4.Label	Metabolism	Metabolism of cofactors and vitamins	Pantothenate and CoA biosynthesis	0
NC	AceBT6.Label	Metabolism	Metabolism of cofactors and vitamins	Pantothenate and CoA biosynthesis	0
NC	AceBT8.Label	Metabolism	Metabolism of cofactors and vitamins	Pantothenate and CoA biosynthesis	0
NC	GluT4.Label	Metabolism	Metabolism of cofactors and vitamins	Pantothenate and CoA biosynthesis	0.000109902
NC	GluT6.Label	Metabolism	Metabolism of cofactors and vitamins	Pantothenate and CoA biosynthesis	0
NC	GluT8.Label	Metabolism	Metabolism of cofactors and vitamins	Pantothenate and CoA biosynthesis	0.00012955
NC	L13T4.Label	Metabolism	Metabolism of cofactors and vitamins	Pantothenate and CoA biosynthesis	0
NC	L13T6.Label	Metabolism	Metabolism of cofactors and vitamins	Pantothenate and CoA biosynthesis	0
NC	L13T8.Label	Metabolism	Metabolism of cofactors and vitamins	Pantothenate and CoA biosynthesis	0.000140865
cyano	AceBT4.Label	Metabolism	Metabolism of cofactors and vitamins	Porphyrin and chlorophyll metabolism	0
cyano	AceBT6.Label	Metabolism	Metabolism of cofactors and vitamins	Porphyrin and chlorophyll metabolism	0.000303306
cyano	AceBT8.Label	Metabolism	Metabolism of cofactors and vitamins	Porphyrin and chlorophyll metabolism	0.000337548
cyano	GluT4.Label	Metabolism	Metabolism of cofactors and vitamins	Porphyrin and chlorophyll metabolism	0.000219804
cyano	GluT6.Label	Metabolism	Metabolism of cofactors and vitamins	Porphyrin and chlorophyll metabolism	0.00055142
cyano	GluT8.Label	Metabolism	Metabolism of cofactors and vitamins	Porphyrin and chlorophyll metabolism	0.0010364
cyano	L13T4.Label	Metabolism	Metabolism of cofactors and vitamins	Porphyrin and chlorophyll metabolism	0.000118582
cyano	L13T6.Label	Metabolism	Metabolism of cofactors and vitamins	Porphyrin and chlorophyll metabolism	0.000205128
cyano	L13T8.Label	Metabolism	Metabolism of cofactors and vitamins	Porphyrin and chlorophyll metabolism	0.00211298
NC	AceBT4.Label	Metabolism	Metabolism of cofactors and vitamins	Porphyrin and chlorophyll metabolism	0
NC	AceBT6.Label	Metabolism	Metabolism of cofactors and vitamins	Porphyrin and chlorophyll metabolism	0
NC	AceBT8.Label	Metabolism	Metabolism of cofactors and vitamins	Porphyrin and chlorophyll metabolism	0
NC	GluT4.Label	Metabolism	Metabolism of cofactors and vitamins	Porphyrin and chlorophyll metabolism	0
NC	GluT6.Label	Metabolism	Metabolism of cofactors and vitamins	Porphyrin and chlorophyll metabolism	0
NC	GluT8.Label	Metabolism	Metabolism of cofactors and vitamins	Porphyrin and chlorophyll metabolism	0
NC	L13T4.Label	Metabolism	Metabolism of cofactors and vitamins	Porphyrin and chlorophyll metabolism	0
NC	L13T6.Label	Metabolism	Metabolism of cofactors and vitamins	Porphyrin and chlorophyll metabolism	0
NC	L13T8.Label	Metabolism	Metabolism of cofactors and vitamins	Porphyrin and chlorophyll metabolism	0.00028173
cyano	AceBT4.Label	Metabolism	Metabolism of cofactors and vitamins	Thiamine metabolism	0
cyano	AceBT6.Label	Metabolism	Metabolism of cofactors and vitamins	Thiamine metabolism	0
cyano	AceBT8.Label	Metabolism	Metabolism of cofactors and vitamins	Thiamine metabolism	0
cyano	GluT4.Label	Metabolism	Metabolism of cofactors and vitamins	Thiamine metabolism	0
cyano	GluT6.Label	Metabolism	Metabolism of cofactors and vitamins	Thiamine metabolism	0
cyano	GluT8.Label	Metabolism	Metabolism of cofactors and vitamins	Thiamine metabolism	0.00012955
cyano	L13T4.Label	Metabolism	Metabolism of cofactors and vitamins	Thiamine metabolism	0
cyano	L13T6.Label	Metabolism	Metabolism of cofactors and vitamins	Thiamine metabolism	0
cyano	L13T8.Label	Metabolism	Metabolism of cofactors and vitamins	Thiamine metabolism	0.00028173
NC	AceBT4.Label	Metabolism	Metabolism of cofactors and vitamins	Thiamine metabolism	0
NC	AceBT6.Label	Metabolism	Metabolism of cofactors and vitamins	Thiamine metabolism	0
NC	AceBT8.Label	Metabolism	Metabolism of cofactors and vitamins	Thiamine metabolism	0
NC	GluT4.Label	Metabolism	Metabolism of cofactors and vitamins	Thiamine metabolism	0
NC	GluT6.Label	Metabolism	Metabolism of cofactors and vitamins	Thiamine metabolism	0
NC	GluT8.Label	Metabolism	Metabolism of cofactors and vitamins	Thiamine metabolism	0.00012955
NC	L13T4.Label	Metabolism	Metabolism of cofactors and vitamins	Thiamine metabolism	0
NC	L13T6.Label	Metabolism	Metabolism of cofactors and vitamins	Thiamine metabolism	0
NC	L13T8.Label	Metabolism	Metabolism of cofactors and vitamins	Thiamine metabolism	0
NC	AceBT4.Label	Metabolism	Metabolism of cofactors and vitamins	Ubiquinone and other terpenoidquinone biosynthesis	0
NC	AceBT6.Label	Metabolism	Metabolism of cofactors and vitamins	Ubiquinone and other terpenoidquinone biosynthesis	0
NC	AceBT8.Label	Metabolism	Metabolism of cofactors and vitamins	Ubiquinone and other terpenoidquinone biosynthesis	0
NC	GluT4.Label	Metabolism	Metabolism of cofactors and vitamins	Ubiquinone and other terpenoidquinone biosynthesis	0.000109902
NC	GluT6.Label	Metabolism	Metabolism of cofactors and vitamins	Ubiquinone and other terpenoidquinone biosynthesis	0
NC	GluT8.Label	Metabolism	Metabolism of cofactors and vitamins	Ubiquinone and other terpenoidquinone biosynthesis	0
NC	L13T4.Label	Metabolism	Metabolism of cofactors and vitamins	Ubiquinone and other terpenoidquinone biosynthesis	0
NC	L13T6.Label	Metabolism	Metabolism of cofactors and vitamins	Ubiquinone and other terpenoidquinone biosynthesis	0
NC	L13T8.Label	Metabolism	Metabolism of cofactors and vitamins	Ubiquinone and other terpenoidquinone biosynthesis	0
cyano	AceBT4.Label	Metabolism	Metabolism of other amino acids	betaAlanine metabolism	0
cyano	AceBT6.Label	Metabolism	Metabolism of other amino acids	betaAlanine metabolism	0
cyano	AceBT8.Label	Metabolism	Metabolism of other amino acids	betaAlanine metabolism	0
cyano	GluT4.Label	Metabolism	Metabolism of other amino acids	betaAlanine metabolism	0
cyano	GluT6.Label	Metabolism	Metabolism of other amino acids	betaAlanine metabolism	0
cyano	GluT8.Label	Metabolism	Metabolism of other amino acids	betaAlanine metabolism	0
cyano	L13T4.Label	Metabolism	Metabolism of other amino acids	betaAlanine metabolism	0
cyano	L13T6.Label	Metabolism	Metabolism of other amino acids	betaAlanine metabolism	0
cyano	L13T8.Label	Metabolism	Metabolism of other amino acids	betaAlanine metabolism	0.000140865
NC	AceBT4.Label	Metabolism	Metabolism of other amino acids	betaAlanine metabolism	0
NC	AceBT6.Label	Metabolism	Metabolism of other amino acids	betaAlanine metabolism	0
NC	AceBT8.Label	Metabolism	Metabolism of other amino acids	betaAlanine metabolism	0
NC	GluT4.Label	Metabolism	Metabolism of other amino acids	betaAlanine metabolism	0
NC	GluT6.Label	Metabolism	Metabolism of other amino acids	betaAlanine metabolism	0
NC	GluT8.Label	Metabolism	Metabolism of other amino acids	betaAlanine metabolism	0
NC	L13T4.Label	Metabolism	Metabolism of other amino acids	betaAlanine metabolism	0
NC	L13T6.Label	Metabolism	Metabolism of other amino acids	betaAlanine metabolism	0
NC	L13T8.Label	Metabolism	Metabolism of other amino acids	betaAlanine metabolism	0.000140865
cyano	AceBT4.Label	Metabolism	Metabolism of other amino acids	Cyanoamino acid metabolism	0
cyano	AceBT6.Label	Metabolism	Metabolism of other amino acids	Cyanoamino acid metabolism	0
cyano	AceBT8.Label	Metabolism	Metabolism of other amino acids	Cyanoamino acid metabolism	0
cyano	GluT4.Label	Metabolism	Metabolism of other amino acids	Cyanoamino acid metabolism	0
cyano	GluT6.Label	Metabolism	Metabolism of other amino acids	Cyanoamino acid metabolism	0
cyano	GluT8.Label	Metabolism	Metabolism of other amino acids	Cyanoamino acid metabolism	0
cyano	L13T4.Label	Metabolism	Metabolism of other amino acids	Cyanoamino acid metabolism	0
cyano	L13T6.Label	Metabolism	Metabolism of other amino acids	Cyanoamino acid metabolism	0
cyano	L13T8.Label	Metabolism	Metabolism of other amino acids	Cyanoamino acid metabolism	0.000986054
cyano	AceBT4.Label	Metabolism	Metabolism of other amino acids	Glutathione metabolism	0.000128419
cyano	AceBT6.Label	Metabolism	Metabolism of other amino acids	Glutathione metabolism	0.000303306
cyano	AceBT8.Label	Metabolism	Metabolism of other amino acids	Glutathione metabolism	0.00050627
cyano	GluT4.Label	Metabolism	Metabolism of other amino acids	Glutathione metabolism	0
cyano	GluT6.Label	Metabolism	Metabolism of other amino acids	Glutathione metabolism	0.00027571
cyano	GluT8.Label	Metabolism	Metabolism of other amino acids	Glutathione metabolism	0.000906853
cyano	L13T4.Label	Metabolism	Metabolism of other amino acids	Glutathione metabolism	0.000237164
cyano	L13T6.Label	Metabolism	Metabolism of other amino acids	Glutathione metabolism	0
cyano	L13T8.Label	Metabolism	Metabolism of other amino acids	Glutathione metabolism	0.00478941
NC	AceBT4.Label	Metabolism	Metabolism of other amino acids	Glutathione metabolism	0
NC	AceBT6.Label	Metabolism	Metabolism of other amino acids	Glutathione metabolism	0
NC	AceBT8.Label	Metabolism	Metabolism of other amino acids	Glutathione metabolism	0
NC	GluT4.Label	Metabolism	Metabolism of other amino acids	Glutathione metabolism	0.000109902
NC	GluT6.Label	Metabolism	Metabolism of other amino acids	Glutathione metabolism	0.00027571
NC	GluT8.Label	Metabolism	Metabolism of other amino acids	Glutathione metabolism	0.00012955
NC	L13T4.Label	Metabolism	Metabolism of other amino acids	Glutathione metabolism	0
NC	L13T6.Label	Metabolism	Metabolism of other amino acids	Glutathione metabolism	0
NC	L13T8.Label	Metabolism	Metabolism of other amino acids	Glutathione metabolism	0.000140865
cyano	AceBT4.Label	Metabolism	Metabolism of other amino acids	Selenocompound metabolism	0
cyano	AceBT6.Label	Metabolism	Metabolism of other amino acids	Selenocompound metabolism	0
cyano	AceBT8.Label	Metabolism	Metabolism of other amino acids	Selenocompound metabolism	0.000168748
cyano	GluT4.Label	Metabolism	Metabolism of other amino acids	Selenocompound metabolism	0
cyano	GluT6.Label	Metabolism	Metabolism of other amino acids	Selenocompound metabolism	0
cyano	GluT8.Label	Metabolism	Metabolism of other amino acids	Selenocompound metabolism	0.000518202
cyano	L13T4.Label	Metabolism	Metabolism of other amino acids	Selenocompound metabolism	0.000118582
cyano	L13T6.Label	Metabolism	Metabolism of other amino acids	Selenocompound metabolism	0
cyano	L13T8.Label	Metabolism	Metabolism of other amino acids	Selenocompound metabolism	0.00126778
cyano	AceBT4.Label	Metabolism	Metabolism of other amino acids	Taurine and hypotaurine metabolism	0
cyano	AceBT6.Label	Metabolism	Metabolism of other amino acids	Taurine and hypotaurine metabolism	0
cyano	AceBT8.Label	Metabolism	Metabolism of other amino acids	Taurine and hypotaurine metabolism	0
cyano	GluT4.Label	Metabolism	Metabolism of other amino acids	Taurine and hypotaurine metabolism	0
cyano	GluT6.Label	Metabolism	Metabolism of other amino acids	Taurine and hypotaurine metabolism	0
cyano	GluT8.Label	Metabolism	Metabolism of other amino acids	Taurine and hypotaurine metabolism	0
cyano	L13T4.Label	Metabolism	Metabolism of other amino acids	Taurine and hypotaurine metabolism	0
cyano	L13T6.Label	Metabolism	Metabolism of other amino acids	Taurine and hypotaurine metabolism	0
cyano	L13T8.Label	Metabolism	Metabolism of other amino acids	Taurine and hypotaurine metabolism	0.00028173
cyano	AceBT4.Label	Metabolism	Metabolism of terpenoids and polyketides	Biosynthesis of ansamycins	0
cyano	AceBT6.Label	Metabolism	Metabolism of terpenoids and polyketides	Biosynthesis of ansamycins	0
cyano	AceBT8.Label	Metabolism	Metabolism of terpenoids and polyketides	Biosynthesis of ansamycins	8.44e-05
cyano	GluT4.Label	Metabolism	Metabolism of terpenoids and polyketides	Biosynthesis of ansamycins	0
cyano	GluT6.Label	Metabolism	Metabolism of terpenoids and polyketides	Biosynthesis of ansamycins	0.000137855
cyano	GluT8.Label	Metabolism	Metabolism of terpenoids and polyketides	Biosynthesis of ansamycins	0.000906853
cyano	L13T4.Label	Metabolism	Metabolism of terpenoids and polyketides	Biosynthesis of ansamycins	0
cyano	L13T6.Label	Metabolism	Metabolism of terpenoids and polyketides	Biosynthesis of ansamycins	0
cyano	L13T8.Label	Metabolism	Metabolism of terpenoids and polyketides	Biosynthesis of ansamycins	0.00140865
cyano	AceBT4.Label	Metabolism	Metabolism of terpenoids and polyketides	Terpenoid backbone biosynthesis	0
cyano	AceBT6.Label	Metabolism	Metabolism of terpenoids and polyketides	Terpenoid backbone biosynthesis	0
cyano	AceBT8.Label	Metabolism	Metabolism of terpenoids and polyketides	Terpenoid backbone biosynthesis	0
cyano	GluT4.Label	Metabolism	Metabolism of terpenoids and polyketides	Terpenoid backbone biosynthesis	0
cyano	GluT6.Label	Metabolism	Metabolism of terpenoids and polyketides	Terpenoid backbone biosynthesis	0
cyano	GluT8.Label	Metabolism	Metabolism of terpenoids and polyketides	Terpenoid backbone biosynthesis	0
cyano	L13T4.Label	Metabolism	Metabolism of terpenoids and polyketides	Terpenoid backbone biosynthesis	0
cyano	L13T6.Label	Metabolism	Metabolism of terpenoids and polyketides	Terpenoid backbone biosynthesis	0
cyano	L13T8.Label	Metabolism	Metabolism of terpenoids and polyketides	Terpenoid backbone biosynthesis	0.000140865
cyano	AceBT4.Label	Metabolism	Nucleotide metabolism	Purine metabolism	0
cyano	AceBT6.Label	Metabolism	Nucleotide metabolism	Purine metabolism	0
cyano	AceBT8.Label	Metabolism	Nucleotide metabolism	Purine metabolism	0.000421948
cyano	GluT4.Label	Metabolism	Nucleotide metabolism	Purine metabolism	0
cyano	GluT6.Label	Metabolism	Nucleotide metabolism	Purine metabolism	0.000137855
cyano	GluT8.Label	Metabolism	Nucleotide metabolism	Purine metabolism	0.0020728
cyano	L13T4.Label	Metabolism	Nucleotide metabolism	Purine metabolism	0
cyano	L13T6.Label	Metabolism	Nucleotide metabolism	Purine metabolism	0
cyano	L13T8.Label	Metabolism	Nucleotide metabolism	Purine metabolism	0.00662065
NC	AceBT4.Label	Metabolism	Nucleotide metabolism	Purine metabolism	0
NC	AceBT6.Label	Metabolism	Nucleotide metabolism	Purine metabolism	0
NC	AceBT8.Label	Metabolism	Nucleotide metabolism	Purine metabolism	0
NC	GluT4.Label	Metabolism	Nucleotide metabolism	Purine metabolism	0.000109902
NC	GluT6.Label	Metabolism	Nucleotide metabolism	Purine metabolism	0.000137855
NC	GluT8.Label	Metabolism	Nucleotide metabolism	Purine metabolism	0.000259101
NC	L13T4.Label	Metabolism	Nucleotide metabolism	Purine metabolism	0
NC	L13T6.Label	Metabolism	Nucleotide metabolism	Purine metabolism	0
NC	L13T8.Label	Metabolism	Nucleotide metabolism	Purine metabolism	0.00028173
cyano	AceBT4.Label	Metabolism	Nucleotide metabolism	Pyrimidine metabolism	0
cyano	AceBT6.Label	Metabolism	Nucleotide metabolism	Pyrimidine metabolism	0
cyano	AceBT8.Label	Metabolism	Nucleotide metabolism	Pyrimidine metabolism	8.44e-05
cyano	GluT4.Label	Metabolism	Nucleotide metabolism	Pyrimidine metabolism	0
cyano	GluT6.Label	Metabolism	Nucleotide metabolism	Pyrimidine metabolism	0
cyano	GluT8.Label	Metabolism	Nucleotide metabolism	Pyrimidine metabolism	0.0002591
cyano	L13T4.Label	Metabolism	Nucleotide metabolism	Pyrimidine metabolism	0
cyano	L13T6.Label	Metabolism	Nucleotide metabolism	Pyrimidine metabolism	0
cyano	L13T8.Label	Metabolism	Nucleotide metabolism	Pyrimidine metabolism	0.00309903
NC	AceBT4.Label	Metabolism	Nucleotide metabolism	Pyrimidine metabolism	0
NC	AceBT6.Label	Metabolism	Nucleotide metabolism	Pyrimidine metabolism	0
NC	AceBT8.Label	Metabolism	Nucleotide metabolism	Pyrimidine metabolism	0
NC	GluT4.Label	Metabolism	Nucleotide metabolism	Pyrimidine metabolism	0.000109902
NC	GluT6.Label	Metabolism	Nucleotide metabolism	Pyrimidine metabolism	0.000137855
NC	GluT8.Label	Metabolism	Nucleotide metabolism	Pyrimidine metabolism	0.000259101
NC	L13T4.Label	Metabolism	Nucleotide metabolism	Pyrimidine metabolism	0
NC	L13T6.Label	Metabolism	Nucleotide metabolism	Pyrimidine metabolism	0
NC	L13T8.Label	Metabolism	Nucleotide metabolism	Pyrimidine metabolism	0.00028173
cyano	AceBT4.Label	Metabolism	Xenobiotics biodegradation and metabolism	Caprolactam degradation	0
cyano	AceBT6.Label	Metabolism	Xenobiotics biodegradation and metabolism	Caprolactam degradation	0
cyano	AceBT8.Label	Metabolism	Xenobiotics biodegradation and metabolism	Caprolactam degradation	0
cyano	GluT4.Label	Metabolism	Xenobiotics biodegradation and metabolism	Caprolactam degradation	0
cyano	GluT6.Label	Metabolism	Xenobiotics biodegradation and metabolism	Caprolactam degradation	0
cyano	GluT8.Label	Metabolism	Xenobiotics biodegradation and metabolism	Caprolactam degradation	0
cyano	L13T4.Label	Metabolism	Xenobiotics biodegradation and metabolism	Caprolactam degradation	0.000118582
cyano	L13T6.Label	Metabolism	Xenobiotics biodegradation and metabolism	Caprolactam degradation	0
cyano	L13T8.Label	Metabolism	Xenobiotics biodegradation and metabolism	Caprolactam degradation	0.00056346
cyano	AceBT4.Label	Metabolism	Xenobiotics biodegradation and metabolism	Chloroalkane and chloroalkene degradation	0
cyano	AceBT6.Label	Metabolism	Xenobiotics biodegradation and metabolism	Chloroalkane and chloroalkene degradation	0.000808816
cyano	AceBT8.Label	Metabolism	Xenobiotics biodegradation and metabolism	Chloroalkane and chloroalkene degradation	8.44e-05
cyano	GluT4.Label	Metabolism	Xenobiotics biodegradation and metabolism	Chloroalkane and chloroalkene degradation	0
cyano	GluT6.Label	Metabolism	Xenobiotics biodegradation and metabolism	Chloroalkane and chloroalkene degradation	0.000964985
cyano	GluT8.Label	Metabolism	Xenobiotics biodegradation and metabolism	Chloroalkane and chloroalkene degradation	0.0002591
cyano	L13T4.Label	Metabolism	Xenobiotics biodegradation and metabolism	Chloroalkane and chloroalkene degradation	0
cyano	L13T6.Label	Metabolism	Xenobiotics biodegradation and metabolism	Chloroalkane and chloroalkene degradation	0.000410256
cyano	L13T8.Label	Metabolism	Xenobiotics biodegradation and metabolism	Chloroalkane and chloroalkene degradation	0.00084519
NC	AceBT4.Label	Metabolism	Xenobiotics biodegradation and metabolism	Chloroalkane and chloroalkene degradation	0
NC	AceBT6.Label	Metabolism	Xenobiotics biodegradation and metabolism	Chloroalkane and chloroalkene degradation	0
NC	AceBT8.Label	Metabolism	Xenobiotics biodegradation and metabolism	Chloroalkane and chloroalkene degradation	0
NC	GluT4.Label	Metabolism	Xenobiotics biodegradation and metabolism	Chloroalkane and chloroalkene degradation	0
NC	GluT6.Label	Metabolism	Xenobiotics biodegradation and metabolism	Chloroalkane and chloroalkene degradation	0.000137855
NC	GluT8.Label	Metabolism	Xenobiotics biodegradation and metabolism	Chloroalkane and chloroalkene degradation	0
NC	L13T4.Label	Metabolism	Xenobiotics biodegradation and metabolism	Chloroalkane and chloroalkene degradation	0
NC	L13T6.Label	Metabolism	Xenobiotics biodegradation and metabolism	Chloroalkane and chloroalkene degradation	0
NC	L13T8.Label	Metabolism	Xenobiotics biodegradation and metabolism	Chloroalkane and chloroalkene degradation	0
cyano	AceBT4.Label	Metabolism	Xenobiotics biodegradation and metabolism	Chlorocyclohexane and chlorobenzene degradation	0
cyano	AceBT6.Label	Metabolism	Xenobiotics biodegradation and metabolism	Chlorocyclohexane and chlorobenzene degradation	0.000101102
cyano	AceBT8.Label	Metabolism	Xenobiotics biodegradation and metabolism	Chlorocyclohexane and chlorobenzene degradation	0
cyano	GluT4.Label	Metabolism	Xenobiotics biodegradation and metabolism	Chlorocyclohexane and chlorobenzene degradation	0
cyano	GluT6.Label	Metabolism	Xenobiotics biodegradation and metabolism	Chlorocyclohexane and chlorobenzene degradation	0
cyano	GluT8.Label	Metabolism	Xenobiotics biodegradation and metabolism	Chlorocyclohexane and chlorobenzene degradation	0
cyano	L13T4.Label	Metabolism	Xenobiotics biodegradation and metabolism	Chlorocyclohexane and chlorobenzene degradation	0.000118582
cyano	L13T6.Label	Metabolism	Xenobiotics biodegradation and metabolism	Chlorocyclohexane and chlorobenzene degradation	0
cyano	L13T8.Label	Metabolism	Xenobiotics biodegradation and metabolism	Chlorocyclohexane and chlorobenzene degradation	0.00056346
cyano	AceBT4.Label	Metabolism	Xenobiotics biodegradation and metabolism	Drug metabolism cytochrome P450	0
cyano	AceBT6.Label	Metabolism	Xenobiotics biodegradation and metabolism	Drug metabolism cytochrome P450	0
cyano	AceBT8.Label	Metabolism	Xenobiotics biodegradation and metabolism	Drug metabolism cytochrome P450	0
cyano	GluT4.Label	Metabolism	Xenobiotics biodegradation and metabolism	Drug metabolism cytochrome P450	0
cyano	GluT6.Label	Metabolism	Xenobiotics biodegradation and metabolism	Drug metabolism cytochrome P450	0
cyano	GluT8.Label	Metabolism	Xenobiotics biodegradation and metabolism	Drug metabolism cytochrome P450	0
cyano	L13T4.Label	Metabolism	Xenobiotics biodegradation and metabolism	Drug metabolism cytochrome P450	0
cyano	L13T6.Label	Metabolism	Xenobiotics biodegradation and metabolism	Drug metabolism cytochrome P450	0
cyano	L13T8.Label	Metabolism	Xenobiotics biodegradation and metabolism	Drug metabolism cytochrome P450	0.000422595
cyano	AceBT4.Label	Metabolism	Xenobiotics biodegradation and metabolism	Drug metabolism other enzymes	0
cyano	AceBT6.Label	Metabolism	Xenobiotics biodegradation and metabolism	Drug metabolism other enzymes	0
cyano	AceBT8.Label	Metabolism	Xenobiotics biodegradation and metabolism	Drug metabolism other enzymes	0
cyano	GluT4.Label	Metabolism	Xenobiotics biodegradation and metabolism	Drug metabolism other enzymes	0
cyano	GluT6.Label	Metabolism	Xenobiotics biodegradation and metabolism	Drug metabolism other enzymes	0
cyano	GluT8.Label	Metabolism	Xenobiotics biodegradation and metabolism	Drug metabolism other enzymes	0.0002591
cyano	L13T4.Label	Metabolism	Xenobiotics biodegradation and metabolism	Drug metabolism other enzymes	0
cyano	L13T6.Label	Metabolism	Xenobiotics biodegradation and metabolism	Drug metabolism other enzymes	0
cyano	L13T8.Label	Metabolism	Xenobiotics biodegradation and metabolism	Drug metabolism other enzymes	0
NC	AceBT4.Label	Metabolism	Xenobiotics biodegradation and metabolism	Drug metabolism other enzymes	0
NC	AceBT6.Label	Metabolism	Xenobiotics biodegradation and metabolism	Drug metabolism other enzymes	0
NC	AceBT8.Label	Metabolism	Xenobiotics biodegradation and metabolism	Drug metabolism other enzymes	0
NC	GluT4.Label	Metabolism	Xenobiotics biodegradation and metabolism	Drug metabolism other enzymes	0
NC	GluT6.Label	Metabolism	Xenobiotics biodegradation and metabolism	Drug metabolism other enzymes	0
NC	GluT8.Label	Metabolism	Xenobiotics biodegradation and metabolism	Drug metabolism other enzymes	0
NC	L13T4.Label	Metabolism	Xenobiotics biodegradation and metabolism	Drug metabolism other enzymes	0
NC	L13T6.Label	Metabolism	Xenobiotics biodegradation and metabolism	Drug metabolism other enzymes	0
NC	L13T8.Label	Metabolism	Xenobiotics biodegradation and metabolism	Drug metabolism other enzymes	0.000140865
cyano	AceBT4.Label	Metabolism	Xenobiotics biodegradation and metabolism	Fluorobenzoate degradation	0
cyano	AceBT6.Label	Metabolism	Xenobiotics biodegradation and metabolism	Fluorobenzoate degradation	0.000101102
cyano	AceBT8.Label	Metabolism	Xenobiotics biodegradation and metabolism	Fluorobenzoate degradation	0
cyano	GluT4.Label	Metabolism	Xenobiotics biodegradation and metabolism	Fluorobenzoate degradation	0
cyano	GluT6.Label	Metabolism	Xenobiotics biodegradation and metabolism	Fluorobenzoate degradation	0
cyano	GluT8.Label	Metabolism	Xenobiotics biodegradation and metabolism	Fluorobenzoate degradation	0
cyano	L13T4.Label	Metabolism	Xenobiotics biodegradation and metabolism	Fluorobenzoate degradation	0.000118582
cyano	L13T6.Label	Metabolism	Xenobiotics biodegradation and metabolism	Fluorobenzoate degradation	0
cyano	L13T8.Label	Metabolism	Xenobiotics biodegradation and metabolism	Fluorobenzoate degradation	0.00056346
cyano	AceBT4.Label	Metabolism	Xenobiotics biodegradation and metabolism	Metabolism of xenobiotics by cytochrome P450	0
cyano	AceBT6.Label	Metabolism	Xenobiotics biodegradation and metabolism	Metabolism of xenobiotics by cytochrome P450	0
cyano	AceBT8.Label	Metabolism	Xenobiotics biodegradation and metabolism	Metabolism of xenobiotics by cytochrome P450	0
cyano	GluT4.Label	Metabolism	Xenobiotics biodegradation and metabolism	Metabolism of xenobiotics by cytochrome P450	0
cyano	GluT6.Label	Metabolism	Xenobiotics biodegradation and metabolism	Metabolism of xenobiotics by cytochrome P450	0
cyano	GluT8.Label	Metabolism	Xenobiotics biodegradation and metabolism	Metabolism of xenobiotics by cytochrome P450	0
cyano	L13T4.Label	Metabolism	Xenobiotics biodegradation and metabolism	Metabolism of xenobiotics by cytochrome P450	0
cyano	L13T6.Label	Metabolism	Xenobiotics biodegradation and metabolism	Metabolism of xenobiotics by cytochrome P450	0
cyano	L13T8.Label	Metabolism	Xenobiotics biodegradation and metabolism	Metabolism of xenobiotics by cytochrome P450	0.000422595
cyano	AceBT4.Label	Metabolism	Xenobiotics biodegradation and metabolism	Naphthalene degradation	0
cyano	AceBT6.Label	Metabolism	Xenobiotics biodegradation and metabolism	Naphthalene degradation	0
cyano	AceBT8.Label	Metabolism	Xenobiotics biodegradation and metabolism	Naphthalene degradation	0
cyano	GluT4.Label	Metabolism	Xenobiotics biodegradation and metabolism	Naphthalene degradation	0
cyano	GluT6.Label	Metabolism	Xenobiotics biodegradation and metabolism	Naphthalene degradation	0
cyano	GluT8.Label	Metabolism	Xenobiotics biodegradation and metabolism	Naphthalene degradation	0.00012955
cyano	L13T4.Label	Metabolism	Xenobiotics biodegradation and metabolism	Naphthalene degradation	0
cyano	L13T6.Label	Metabolism	Xenobiotics biodegradation and metabolism	Naphthalene degradation	0
cyano	L13T8.Label	Metabolism	Xenobiotics biodegradation and metabolism	Naphthalene degradation	0.00056346
NC	AceBT4.Label	Metabolism	Xenobiotics biodegradation and metabolism	Nitrotoluene degradation	0
NC	AceBT6.Label	Metabolism	Xenobiotics biodegradation and metabolism	Nitrotoluene degradation	0
NC	AceBT8.Label	Metabolism	Xenobiotics biodegradation and metabolism	Nitrotoluene degradation	0
NC	GluT4.Label	Metabolism	Xenobiotics biodegradation and metabolism	Nitrotoluene degradation	0
NC	GluT6.Label	Metabolism	Xenobiotics biodegradation and metabolism	Nitrotoluene degradation	0
NC	GluT8.Label	Metabolism	Xenobiotics biodegradation and metabolism	Nitrotoluene degradation	0
NC	L13T4.Label	Metabolism	Xenobiotics biodegradation and metabolism	Nitrotoluene degradation	0
NC	L13T6.Label	Metabolism	Xenobiotics biodegradation and metabolism	Nitrotoluene degradation	0
NC	L13T8.Label	Metabolism	Xenobiotics biodegradation and metabolism	Nitrotoluene degradation	0.000140865
cyano	AceBT4.Label	Metabolism	Xenobiotics biodegradation and metabolism	Toluene degradation	0
cyano	AceBT6.Label	Metabolism	Xenobiotics biodegradation and metabolism	Toluene degradation	0.000101102
cyano	AceBT8.Label	Metabolism	Xenobiotics biodegradation and metabolism	Toluene degradation	0
cyano	GluT4.Label	Metabolism	Xenobiotics biodegradation and metabolism	Toluene degradation	0
cyano	GluT6.Label	Metabolism	Xenobiotics biodegradation and metabolism	Toluene degradation	0
cyano	GluT8.Label	Metabolism	Xenobiotics biodegradation and metabolism	Toluene degradation	0
cyano	L13T4.Label	Metabolism	Xenobiotics biodegradation and metabolism	Toluene degradation	0.000118582
cyano	L13T6.Label	Metabolism	Xenobiotics biodegradation and metabolism	Toluene degradation	0
cyano	L13T8.Label	Metabolism	Xenobiotics biodegradation and metabolism	Toluene degradation	0.00056346
